# Supplementary material for: Mothers Secretor Status Affects Development of Childrens Microbiota Composition and Function: A Pilot Study
Source: PLoS One. 2016 Sep 19;11(9):e0161211. doi: 10.1371/journal.pone.0161211 (PMC5028039; doi:10.1371/journal.pone.0161211)
Supplement: S3 Table — LEfSe analysis of differential abundance of KEGG Functional Pathways in the childrens’ PICRUSt predicted metagenome by child secretor status, mother secretor status, mother secretor status ABF (Any Breast-Feeding in first 4 months of life) subgroup and mother secretor status EBF (Exclusively Breast-Fed in first 4 months of life) subgroup. (XLSX) [file pone.0161211.s003.xlsx]

## Sheet: ChildSecretorStatus
KEGG Functional Group	log Class Average	Class	LDA Effect Size	p
Metabolism.LipidMetabolism.Arachidonicacidmetabolism	2.42082	N	2.13258	0.021827
Metabolism.MetabolismofTerpenoidsandPolyketides.Biosynthesisofsiderophoregroupnonribosomalpeptides	2.42052	N	2.27562	0.0191725
HumanDiseases	3.85434	N	2.34469	0.028108
CellularProcesses.CellGrowthandDeath.Cellcycle	0			-
GeneticInformationProcessing.Transcription.Basaltranscriptionfactors	1.2161			-
HumanDiseases.Cancers.Renalcellcarcinoma	2.04477			-
OrganismalSystems.ImmuneSystem.Hematopoieticcelllineage	0			-
EnvironmentalInformationProcessing.SignalTransduction.Phosphatidylinositolsignalingsystem	2.93839			-
Metabolism.AminoAcidMetabolism.Lysinedegradation	3.14944			-
Metabolism.GlycanBiosynthesisandMetabolism.Glycosphingolipidbiosynthesis_globoseries	3.05358			-
HumanDiseases.InfectiousDiseases.Bacterialinvasionofepithelialcells	1.06099			-
Metabolism.MetabolismofTerpenoidsandPolyketides.Tetracyclinebiosynthesis	3.16988			-
Unclassified.GeneticInformationProcessing.Replication_recombinationandrepairproteins	3.93013			-
Metabolism.MetabolismofOtherAminoAcids.Selenocompoundmetabolism	3.55775			-
CellularProcesses.CellGrowthandDeath.p53signalingpathway	0			-
HumanDiseases.ImmuneSystemDiseases.Primaryimmunodeficiency	2.61684			-
HumanDiseases.InfectiousDiseases.Shigellosis	0.481468			-
HumanDiseases.Cancers.Bladdercancer	0.994236			-
GeneticInformationProcessing.Folding_SortingandDegradation.Proteinprocessinginendoplasmicreticulum	2.81417			-
GeneticInformationProcessing.Folding_SortingandDegradation.Proteinexport	3.77544			-
Metabolism.MetabolismofOtherAminoAcids.D_GlutamineandD_glutamatemetabolism	3.16899			-
EnvironmentalInformationProcessing.SignalTransduction.Calciumsignalingpathway	0			-
HumanDiseases.InfectiousDiseases.Vibriocholeraepathogeniccycle	2.82556			-
Metabolism.MetabolismofOtherAminoAcids.Glutathionemetabolism	3.26168			-
OrganismalSystems.EnvironmentalAdaptation	3.21161			-
Metabolism.EnzymeFamilies.CytochromeP450	0			-
Metabolism.BiosynthesisofOtherSecondaryMetabolites.Penicillinandcephalosporinbiosynthesis	2.47842			-
OrganismalSystems.CirculatorySystem	0			-
HumanDiseases.InfectiousDiseases.InfluenzaA	0			-
OrganismalSystems	3.85863			-
HumanDiseases.CardiovascularDiseases.Dilatedcardiomyopathy_DCM_	0			-
Metabolism.LipidMetabolism.Linoleicacidmetabolism	2.85872			-
Metabolism.EnergyMetabolism.Carbonfixationpathwaysinprokaryotes	3.9804			-
Metabolism.CarbohydrateMetabolism.Glyoxylateanddicarboxylatemetabolism	3.72278			-
EnvironmentalInformationProcessing.SignalingMoleculesandInteraction.Neuroactiveligand_receptorinteraction	0			-
Unclassified.Metabolism.Nucleotidemetabolism	2.67196			-
Metabolism.MetabolismofOtherAminoAcids.D_ArginineandD_ornithinemetabolism	1.79329			-
CellularProcesses.CellGrowthandDeath	3.70332			-
CellularProcesses	4.44273			-
Metabolism.GlycanBiosynthesisandMetabolism.Glycosphingolipidbiosynthesis_ganglioseries	2.66852			-
Unclassified.CellularProcessesandSignaling.Sporulation	3.93063			-
OrganismalSystems.EnvironmentalAdaptation.Plant_pathogeninteraction	3.199			-
Metabolism.AminoAcidMetabolism.Phenylalaninemetabolism	3.26991			-
EnvironmentalInformationProcessing.SignalingMoleculesandInteraction.Glycanbindngproteins	0			-
Metabolism.BiosynthesisofOtherSecondaryMetabolites.Stilbenoid_diarylheptanoidandgingerolbiosynthesis	0.464313			-
CellularProcesses.TransportandCatabolism.Lysosome	3.10671			-
Metabolism.GlycanBiosynthesisandMetabolism.Glycosaminoglycandegradation	2.94156			-
OrganismalSystems.DigestiveSystem.Gastricacidsecretion	0			-
GeneticInformationProcessing.ReplicationandRepair.Nucleotideexcisionrepair	3.6014			-
Metabolism.GlycanBiosynthesisandMetabolism.Peptidoglycanbiosynthesis	3.91701			-
Metabolism.MetabolismofCofactorsandVitamins.Ubiquinoneandotherterpenoid_quinonebiosynthesis	3.20019			-
CellularProcesses.CellGrowthandDeath.Cellcycle_Caulobacter	3.69579			-
HumanDiseases.CardiovascularDiseases.Arrhythmogenicrightventricularcardiomyopathy_ARVC_	0			-
CellularProcesses.CellMotility.Flagellarassembly	3.49893			-
Metabolism.MetabolismofCofactorsandVitamins.Thiaminemetabolism	3.71241			-
Metabolism.MetabolismofCofactorsandVitamins.Porphyrinandchlorophyllmetabolism	4.02001			-
HumanDiseases.Cancers.Pathwaysincancer	2.71639			-
Metabolism.LipidMetabolism.Etherlipidmetabolism	1.26049			-
Unclassified.Metabolism.Metabolismofcofactorsandvitamins	3.08528			-
CellularProcesses.TransportandCatabolism.Endocytosis	0			-
HumanDiseases.Cancers.Pancreaticcancer	0			-
Unclassified.GeneticInformationProcessing.Transcriptionrelatedproteins	2.07878			-
Metabolism.LipidMetabolism.alpha_Linolenicacidmetabolism	1.50303			-
EnvironmentalInformationProcessing.SignalingMoleculesandInteraction.Ionchannels	2.19869			-
Metabolism.MetabolismofCofactorsandVitamins.PantothenateandCoAbiosynthesis	3.8024			-
Metabolism.GlycanBiosynthesisandMetabolism	4.36107			-
Metabolism.MetabolismofTerpenoidsandPolyketides.Biosynthesisofansamycins	3.13048			-
HumanDiseases.Cancers	3.02969			-
Metabolism.GlycanBiosynthesisandMetabolism.OthertypesofO_glycanbiosynthesis	0			-
HumanDiseases.InfectiousDiseases.EpithelialcellsignalinginHelicobacterpyloriinfection	2.96119			-
Metabolism.CarbohydrateMetabolism.Propanoatemetabolism	3.69691			-
HumanDiseases.InfectiousDiseases.Amoebiasis	2.10491			-
Unclassified.CellularProcessesandSignaling	4.62528			-
Metabolism.XenobioticsBiodegradationandMetabolism.Bisphenoldegradation	2.94069			-
Metabolism.LipidMetabolism.Fattyacidmetabolism	3.36191			-
Unclassified.CellularProcessesandSignaling.Celldivision	2.81001			-
Metabolism.LipidMetabolism.Steroidbiosynthesis	2.14535			-
Metabolism.LipidMetabolism.Synthesisanddegradationofketonebodies	2.46112			-
HumanDiseases.Cancers.Chronicmyeloidleukemia	0			-
Metabolism.LipidMetabolism.Lipidbiosynthesisproteins	3.78309			-
OrganismalSystems.EndocrineSystem.Insulinsignalingpathway	3.00078			-
OrganismalSystems.SensorySystem.Phototransduction	0			-
Metabolism.GlycanBiosynthesisandMetabolism.Glycosphingolipidbiosynthesis_lactoandneolactoseries	0.0958437			-
Metabolism.BiosynthesisofOtherSecondaryMetabolites.Flavonoidbiosynthesis	2.03118			-
HumanDiseases.NeurodegenerativeDiseases.Priondiseases	1.75305			-
OrganismalSystems.EndocrineSystem.PPARsignalingpathway	3.03822			-
EnvironmentalInformationProcessing.SignalingMoleculesandInteraction.Gprotein_coupledreceptors	0			-
EnvironmentalInformationProcessing.SignalingMoleculesandInteraction.Cytokine_cytokinereceptorinteraction	0			-
Metabolism.CarbohydrateMetabolism.Aminosugarandnucleotidesugarmetabolism	4.15965			-
Metabolism.EnzymeFamilies.Peptidases	4.27233			-
OrganismalSystems.ImmuneSystem.NOD_likereceptorsignalingpathway	2.61993			-
Metabolism.AminoAcidMetabolism.Valine_leucineandisoleucinedegradation	3.31076			-
HumanDiseases.Cancers.Glioma	0			-
Metabolism.CarbohydrateMetabolism.Butanoatemetabolism	3.78305			-
OrganismalSystems.ImmuneSystem.Antigenprocessingandpresentation	2.61208			-
Metabolism.LipidMetabolism.Secondarybileacidbiosynthesis	2.5745			-
Metabolism.EnzymeFamilies	4.34063			-
Unclassified.CellularProcessesandSignaling.Cellmotilityandsecretion	3.32511			-
OrganismalSystems.DigestiveSystem.Pancreaticsecretion	0			-
Unclassified.CellularProcessesandSignaling.Inorganiciontransportandmetabolism	3.3614			-
Metabolism.XenobioticsBiodegradationandMetabolism.Benzoatedegradation	3.32081			-
EnvironmentalInformationProcessing.MembraneTransport.Bacterialsecretionsystem	3.80865			-
GeneticInformationProcessing.ReplicationandRepair.Homologousrecombination	3.96869			-
Metabolism.MetabolismofTerpenoidsandPolyketides.Prenyltransferases	3.49717			-
Metabolism.MetabolismofTerpenoidsandPolyketides.Terpenoidbackbonebiosynthesis	3.76561			-
CellularProcesses.CellGrowthandDeath.Cellcycle_yeast	0			-
GeneticInformationProcessing.Folding_SortingandDegradation.Proteasome	2.63202			-
OrganismalSystems.NervousSystem	3.02233			-
Unclassified.Metabolism.Lipidmetabolism	3.1687			-
GeneticInformationProcessing.ReplicationandRepair.Baseexcisionrepair	3.65468			-
CellularProcesses.CellCommunication.Adherensjunction	0			-
Metabolism.AminoAcidMetabolism.Lysinebiosynthesis	3.93551			-
Metabolism.AminoAcidMetabolism.Histidinemetabolism	3.7869			-
Unclassified.PoorlyCharacterized.Functionunknown	4.10757			-
Metabolism.EnergyMetabolism.Photosynthesis	3.59702			-
Metabolism.LipidMetabolism.Glycerophospholipidmetabolism	3.77494			-
HumanDiseases.ImmuneSystemDiseases.Systemiclupuserythematosus	1.66738			-
EnvironmentalInformationProcessing.SignalTransduction.Hedgehogsignalingpathway	0			-
Metabolism.XenobioticsBiodegradationandMetabolism.Caprolactamdegradation	2.5771			-
EnvironmentalInformationProcessing.SignalTransduction.MAPKsignalingpathway	0			-
Metabolism.BiosynthesisofOtherSecondaryMetabolites.Phenylpropanoidbiosynthesis	3.18489			-
OrganismalSystems.SensorySystem.Phototransduction_fly	0			-
GeneticInformationProcessing.Translation	4.75865			-
Metabolism.CarbohydrateMetabolism.C5_Brancheddibasicacidmetabolism	3.50294			-
Metabolism.BiosynthesisofOtherSecondaryMetabolites.beta_Lactamresistance	2.47857			-
CellularProcesses.CellCommunication.Tightjunction	0			-
HumanDiseases.InfectiousDiseases.Toxoplasmosis	0			-
Metabolism.MetabolismofCofactorsandVitamins.Lipoicacidmetabolism	2.42969			-
Metabolism.MetabolismofCofactorsandVitamins.Folatebiosynthesis	3.56881			-
Metabolism.LipidMetabolism.Primarybileacidbiosynthesis	2.57765			-
Metabolism.MetabolismofOtherAminoAcids	4.1407			-
Metabolism.AminoAcidMetabolism.Arginineandprolinemetabolism	4.09846			-
Metabolism.XenobioticsBiodegradationandMetabolism.Ethylbenzenedegradation	2.56337			-
EnvironmentalInformationProcessing.SignalingMoleculesandInteraction.Bacterialtoxins	3.11009			-
OrganismalSystems.NervousSystem.Long_termpotentiation	0			-
Metabolism.AminoAcidMetabolism.Phenylalanine_tyrosineandtryptophanbiosynthesis	3.93409			-
OrganismalSystems.EndocrineSystem.GnRHsignalingpathway	0			-
Metabolism.MetabolismofTerpenoidsandPolyketides.BiosynthesisoftypeIIpolyketidebackbone	0			-
HumanDiseases.MetabolicDiseases.TypeIdiabetesmellitus	2.70061			-
HumanDiseases.NeurodegenerativeDiseases.Huntingtonsdisease	2.43094			-
Metabolism.CarbohydrateMetabolism.Fructoseandmannosemetabolism	4.00333			-
GeneticInformationProcessing.Transcription.RNApolymerase	3.23361			-
Metabolism.MetabolismofTerpenoidsandPolyketides.Polyketidesugarunitbiosynthesis	3.30027			-
GeneticInformationProcessing.Translation.Ribosomebiogenesisineukaryotes	2.67993			-
CellularProcesses.CellGrowthandDeath.Meiosis_yeast	2.01343			-
Unclassified.Metabolism.Energymetabolism	3.9412			-
OrganismalSystems.DigestiveSystem.Salivarysecretion	0			-
Metabolism.CarbohydrateMetabolism	5.02912			-
GeneticInformationProcessing.Translation.RibosomeBiogenesis	4.15783			-
Unclassified.PoorlyCharacterized.Generalfunctionpredictiononly	4.55349			-
Metabolism.EnergyMetabolism.Photosynthesisproteins	3.59905			-
Metabolism.CarbohydrateMetabolism.Pentosephosphatepathway	3.9856			-
Metabolism.XenobioticsBiodegradationandMetabolism.Nitrotoluenedegradation	2.93345			-
Metabolism.XenobioticsBiodegradationandMetabolism	4.21909			-
GeneticInformationProcessing.ReplicationandRepair.Chromosome	4.18901			-
Metabolism.LipidMetabolism.Biosynthesisofunsaturatedfattyacids	3.20498			-
Metabolism.MetabolismofTerpenoidsandPolyketides.Geranioldegradation	2.66807			-
GeneticInformationProcessing.ReplicationandRepair.DNAreplicationproteins	4.0824			-
Unclassified.Metabolism.Carbohydratemetabolism	3.29055			-
CellularProcesses.CellGrowthandDeath.Oocytemeiosis	0			-
Metabolism.GlycanBiosynthesisandMetabolism.Otherglycandegradation	3.44818			-
Metabolism.LipidMetabolism.Fattyacidbiosynthesis	3.68618			-
Metabolism.AminoAcidMetabolism.Tryptophanmetabolism	3.16055			-
Metabolism.BiosynthesisofOtherSecondaryMetabolites.Novobiocinbiosynthesis	3.11724			-
Unclassified.CellularProcessesandSignaling.Signaltransductionmechanisms	3.7081			-
Metabolism.MetabolismofCofactorsandVitamins.Nicotinateandnicotinamidemetabolism	3.61744			-
EnvironmentalInformationProcessing.SignalingMoleculesandInteraction.Cellularantigens	2.44342			-
OrganismalSystems.CirculatorySystem.Cardiacmusclecontraction	0			-
EnvironmentalInformationProcessing.SignalTransduction	4.20926			-
Metabolism.NucleotideMetabolism.Purinemetabolism	4.34623			-
Metabolism.LipidMetabolism.Fattyacidelongationinmitochondria	1.66733			-
GeneticInformationProcessing.Translation.Ribosome	4.37015			-
Metabolism.XenobioticsBiodegradationandMetabolism.Xylenedegradation	2.69785			-
Metabolism.CarbohydrateMetabolism.Pyruvatemetabolism	4.01826			-
EnvironmentalInformationProcessing.SignalingMoleculesandInteraction	3.22773			-
Metabolism.MetabolismofCofactorsandVitamins.Biotinmetabolism	3.17579			-
Metabolism.XenobioticsBiodegradationandMetabolism.Toluenedegradation	3.00245			-
Metabolism.XenobioticsBiodegradationandMetabolism.Atrazinedegradation	2.57559			-
Metabolism.MetabolismofCofactorsandVitamins.Retinolmetabolism	2.4307			-
Unclassified.Metabolism.Others	3.97164			-
Metabolism.AminoAcidMetabolism.Alanine_aspartateandglutamatemetabolism	4.02183			-
Metabolism.EnzymeFamilies.Proteinkinases	3.50353			-
Metabolism.CarbohydrateMetabolism.Starchandsucrosemetabolism	4.01215			-
Metabolism.CarbohydrateMetabolism.Ascorbateandaldaratemetabolism	3.06058			-
Unclassified.PoorlyCharacterized	4.6861			-
Metabolism.XenobioticsBiodegradationandMetabolism.Aminobenzoatedegradation	3.07347			-
HumanDiseases.Cancers.Prostatecancer	2.63248			-
HumanDiseases.NeurodegenerativeDiseases.Amyotrophiclateralsclerosis_ALS_	2.03284			-
Metabolism.BiosynthesisofOtherSecondaryMetabolites.Isoflavonoidbiosynthesis	0			-
Metabolism.CarbohydrateMetabolism.Pentoseandglucuronateinterconversions	3.74867			-
Unclassified.CellularProcessesandSignaling.Membraneandintracellularstructuralmolecules	3.69308			-
Unclassified.GeneticInformationProcessing.Translationproteins	3.97195			-
HumanDiseases.InfectiousDiseases.Leishmaniasis	0			-
HumanDiseases.MetabolicDiseases.TypeIIdiabetesmellitus	2.67211			-
Metabolism.LipidMetabolism.Sphingolipidmetabolism	3.38758			-
Unclassified.CellularProcessesandSignaling.Othertransporters	3.43099			-
Metabolism.BiosynthesisofOtherSecondaryMetabolites.Flavoneandflavonolbiosynthesis	1.79917			-
Metabolism.CarbohydrateMetabolism.Inositolphosphatemetabolism	2.98641			-
EnvironmentalInformationProcessing.SignalTransduction.Wntsignalingpathway	0			-
OrganismalSystems.EndocrineSystem.Melanogenesis	0			-
Unclassified.GeneticInformationProcessing.Restrictionenzyme	3.2751			-
Unclassified.GeneticInformationProcessing.Proteinfoldingandassociatedprocessing	3.82356			-
GeneticInformationProcessing.ReplicationandRepair.Mismatchrepair	3.91077			-
OrganismalSystems.ImmuneSystem.Complementandcoagulationcascades	0			-
GeneticInformationProcessing.Translation.Translationfactors	3.73301			-
EnvironmentalInformationProcessing.SignalingMoleculesandInteraction.CAMligands	0			-
HumanDiseases.InfectiousDiseases.Chagasdisease_Americantrypanosomiasis_	1.81509			-
Metabolism.EnergyMetabolism.Nitrogenmetabolism	3.82842			-
HumanDiseases.ImmuneSystemDiseases.Rheumatoidarthritis	0			-
CellularProcesses.TransportandCatabolism.Phagosome	0			-
Metabolism.BiosynthesisofOtherSecondaryMetabolites.Caffeinemetabolism	1.66734			-
Metabolism.EnergyMetabolism.Oxidativephosphorylation	4.03482			-
Metabolism.GlycanBiosynthesisandMetabolism.N_Glycanbiosynthesis	2.38775			-
Metabolism.AminoAcidMetabolism	4.98407			-
Metabolism.MetabolismofOtherAminoAcids.beta_Alaninemetabolism	3.23667			-
Unclassified.CellularProcessesandSignaling.Electrontransfercarriers	2.45897			-
Metabolism.CarbohydrateMetabolism.Glycolysis_Gluconeogenesis	4.06269			-
Metabolism	5.67408			-
EnvironmentalInformationProcessing.SignalTransduction.VEGFsignalingpathway	0			-
Unclassified.Metabolism	4.41745			-
Metabolism.XenobioticsBiodegradationandMetabolism.MetabolismofxenobioticsbycytochromeP450	2.43492			-
Metabolism.MetabolismofTerpenoidsandPolyketides.Limoneneandpinenedegradation	2.97184			-
HumanDiseases.CardiovascularDiseases.Hypertrophiccardiomyopathy_HCM_	0			-
OrganismalSystems.EnvironmentalAdaptation.Circadianrhythm_plant	1.66829			-
EnvironmentalInformationProcessing.SignalingMoleculesandInteraction.Cytokinereceptors	0			-
HumanDiseases.NeurodegenerativeDiseases.Alzheimersdisease	2.70778			-
EnvironmentalInformationProcessing.MembraneTransport	5.11532			-
Metabolism.GlycanBiosynthesisandMetabolism.Glycosyltransferases	3.52798			-
Metabolism.GlycanBiosynthesisandMetabolism.VarioustypesofN_glycanbiosynthesis	0			-
CellularProcesses.CellCommunication.Focaladhesion	0			-
Metabolism.MetabolismofTerpenoidsandPolyketides.Biosynthesisof12__14_and16_memberedmacrolides	0			-
EnvironmentalInformationProcessing.MembraneTransport.Transporters	4.85924			-
Metabolism.GlycanBiosynthesisandMetabolism.Lipopolysaccharidebiosynthesisproteins	3.53551			-
Metabolism.MetabolismofOtherAminoAcids.Taurineandhypotaurinemetabolism	3.00921			-
Metabolism.LipidMetabolism.Glycerolipidmetabolism	3.63341			-
GeneticInformationProcessing.Translation.Aminoacyl_tRNAbiosynthesis	4.0869			-
Metabolism.MetabolismofCofactorsandVitamins.Onecarbonpoolbyfolate	3.7932			-
Metabolism.MetabolismofCofactorsandVitamins	4.63582			-
GeneticInformationProcessing.Transcription.Spliceosome	0			-
CellularProcesses.CellMotility.Cytoskeletonproteins	3.60668			-
OrganismalSystems.CirculatorySystem.Vascularsmoothmusclecontraction	0			-
EnvironmentalInformationProcessing.MembraneTransport.Secretionsystem	4.10123			-
GeneticInformationProcessing.Folding_SortingandDegradation	4.3892			-
GeneticInformationProcessing.Transcription	4.47444			-
GeneticInformationProcessing.Transcription.Transcriptionmachinery	4.02437			-
GeneticInformationProcessing.ReplicationandRepair	4.94836			-
Metabolism.XenobioticsBiodegradationandMetabolism.Chloroalkaneandchloroalkenedegradation	3.27789			-
EnvironmentalInformationProcessing.SignalTransduction.mTORsignalingpathway	0			-
OrganismalSystems.DigestiveSystem.Bilesecretion	0.465071			-
Metabolism.EnergyMetabolism.Photosynthesis_antennaproteins	0.331414			-
OrganismalSystems.EndocrineSystem.Progesterone_mediatedoocytematuration	2.61208			-
Metabolism.BiosynthesisofOtherSecondaryMetabolites.Clavulanicacidbiosynthesis	0			-
Unclassified.CellularProcessesandSignaling.Germination	2.59669			-
Metabolism.LipidMetabolism.Steroidhormonebiosynthesis	2.53977			-
HumanDiseases.NeurodegenerativeDiseases.Parkinsonsdisease	0.164771			-
HumanDiseases.Cancers.Smallcelllungcancer	0			-
Metabolism.MetabolismofOtherAminoAcids.D_Alaninemetabolism	3.02281			-
Unclassified.Metabolism.Aminoacidmetabolism	3.28812			-
OrganismalSystems.ExcretorySystem.Vasopressin_regulatedwaterreabsorption	0			-
OrganismalSystems.DigestiveSystem.Mineralabsorption	1.72226			-
Metabolism.BiosynthesisofOtherSecondaryMetabolites.Streptomycinbiosynthesis	3.49666			-
GeneticInformationProcessing.Folding_SortingandDegradation.Chaperonesandfoldingcatalysts	3.99437			-
OrganismalSystems.ImmuneSystem.FcepsilonRIsignalingpathway	0			-
OrganismalSystems.NervousSystem.Neurotrophinsignalingpathway	0			-
Unclassified.CellularProcessesandSignaling.Poresionchannels	3.50157			-
Metabolism.CarbohydrateMetabolism.Citratecycle_TCAcycle_	3.76247			-
OrganismalSystems.ExcretorySystem.Aldosterone_regulatedsodiumreabsorption	0			-
Metabolism.XenobioticsBiodegradationandMetabolism.Drugmetabolism_cytochromeP450	2.50022			-
EnvironmentalInformationProcessing.MembraneTransport.Phosphotransferasesystem_PTS_	3.66462			-
HumanDiseases.InfectiousDiseases.Staphylococcusaureusinfection	1.66354			-
HumanDiseases.MetabolicDiseases	2.98642			-
Metabolism.LipidMetabolism	4.47509			-
EnvironmentalInformationProcessing.SignalTransduction.Two_componentsystem	4.17403			-
GeneticInformationProcessing.Folding_SortingandDegradation.RNAdegradation	3.67583			-
Metabolism.XenobioticsBiodegradationandMetabolism.Chlorocyclohexaneandchlorobenzenedegradation	2.23963			-
GeneticInformationProcessing.Folding_SortingandDegradation.Ubiquitinsystem	1.94178			-
EnvironmentalInformationProcessing.SignalingMoleculesandInteraction.GTP_bindingproteins	0			-
CellularProcesses.CellMotility	4.29899			-
HumanDiseases.CardiovascularDiseases.Viralmyocarditis	0			-
Metabolism.BiosynthesisofOtherSecondaryMetabolites.Tropane_piperidineandpyridinealkaloidbiosynthesis	3.05952			-
Metabolism.GlycanBiosynthesisandMetabolism.Lipopolysaccharidebiosynthesis	3.3892			-
Metabolism.XenobioticsBiodegradationandMetabolism.Fluorobenzoatedegradation	2.02106			-
Metabolism.MetabolismofTerpenoidsandPolyketides.Biosynthesisofvancomycingroupantibiotics	2.78331			-
OrganismalSystems.NervousSystem.Long_termdepression	0			-
EnvironmentalInformationProcessing.SignalTransduction.TGF_betasignalingpathway	0			-
Metabolism.MetabolismofTerpenoidsandPolyketides.BiosynthesisoftypeIIpolyketideproducts	0			-
Metabolism.AminoAcidMetabolism.Glycine_serineandthreoninemetabolism	3.90997			-
OrganismalSystems.SensorySystem	0			-
Metabolism.AminoAcidMetabolism.Valine_leucineandisoleucinebiosynthesis	3.88574			-
Metabolism.XenobioticsBiodegradationandMetabolism.Drugmetabolism_otherenzymes	3.50474			-
OrganismalSystems.ImmuneSystem.FcgammaR_mediatedphagocytosis	0			-
GeneticInformationProcessing.Translation.RNAtransport	3.15547			-
Metabolism.CarbohydrateMetabolism.Galactosemetabolism	3.89779			-
Metabolism.GlycanBiosynthesisandMetabolism.Glycosylphosphatidylinositol_GPI__anchorbiosynthesis	0			-
OrganismalSystems.DigestiveSystem.Carbohydratedigestionandabsorption	1.99839			-
OrganismalSystems.NervousSystem.Cholinergicsynapse	0			-
Metabolism.BiosynthesisofOtherSecondaryMetabolites.Butirosinandneomycinbiosynthesis	2.9078			-
EnvironmentalInformationProcessing.SignalingMoleculesandInteraction.ECM_receptorinteraction	0			-
CellularProcesses.CellMotility.Bacterialchemotaxis	3.61618			-
OrganismalSystems.ImmuneSystem.RIG_I_likereceptorsignalingpathway	1.37184			-
HumanDiseases.ImmuneSystemDiseases	2.66308			-
HumanDiseases.InfectiousDiseases.PathogenicEscherichiacoliinfection	0.878126			-
Metabolism.MetabolismofOtherAminoAcids.Cyanoaminoacidmetabolism	3.43222			-
CellularProcesses.CellMotility.Bacterialmotilityproteins	3.94033			-
OrganismalSystems.DigestiveSystem.Proteindigestionandabsorption	2.03458			-
Metabolism.MetabolismofTerpenoidsandPolyketides.Carotenoidbiosynthesis	1.92927			-
Metabolism.BiosynthesisofOtherSecondaryMetabolites.Indolealkaloidbiosynthesis	0			-
OrganismalSystems.DigestiveSystem.Fatdigestionandabsorption	0			-
Metabolism.AminoAcidMetabolism.Aminoacidrelatedenzymes	4.17426			-
HumanDiseases.InfectiousDiseases.Africantrypanosomiasis	1.85406			-
GeneticInformationProcessing.ReplicationandRepair.Non_homologousend_joining	2.29098			-
GeneticInformationProcessing.ReplicationandRepair.DNArepairandrecombinationproteins	4.45791			-
Unclassified.Metabolism.Glycanbiosynthesisandmetabolism	2.40664			-
Metabolism.BiosynthesisofOtherSecondaryMetabolites.Betalainbiosynthesis	0			-
HumanDiseases.InfectiousDiseases.Measles	0			-
HumanDiseases.InfectiousDiseases.HepatitisC	0			-
Metabolism.MetabolismofTerpenoidsandPolyketides.Sesquiterpenoidbiosynthesis	0			-
Metabolism.BiosynthesisofOtherSecondaryMetabolites.Isoquinolinealkaloidbiosynthesis	2.70874			-
CellularProcesses.CellCommunication	0			-
CellularProcesses.CellMotility.Regulationofactincytoskeleton	0			-
HumanDiseases.InfectiousDiseases.Tuberculosis	3.20302			-
GeneticInformationProcessing.Folding_SortingandDegradation.Sulfurrelaysystem	3.4496			-
Metabolism.MetabolismofTerpenoidsandPolyketides	4.21741			-
CellularProcesses.TransportandCatabolism.Peroxisome	3.18948			-
GeneticInformationProcessing.ReplicationandRepair.DNAreplication	3.81411			-
OrganismalSystems.EndocrineSystem	3.49805			-
Metabolism.GlycanBiosynthesisandMetabolism.Glycosaminoglycanbiosynthesis_chondroitinsulfate	0			-
OrganismalSystems.ImmuneSystem.Leukocytetransendothelialmigration	0			-
GeneticInformationProcessing.Transcription.Transcriptionfactors	4.2467			-
Metabolism.EnergyMetabolism.Carbonfixationinphotosyntheticorganisms	3.82699			-
Metabolism.MetabolismofCofactorsandVitamins.Riboflavinmetabolism	3.34554			-
Metabolism.NucleotideMetabolism	4.60604			-
OrganismalSystems.ExcretorySystem.Proximaltubulebicarbonatereclamation	2.45907			-
EnvironmentalInformationProcessing.SignalTransduction.Notchsignalingpathway	0			-
GeneticInformationProcessing	5.30078			-
Metabolism.XenobioticsBiodegradationandMetabolism.Polycyclicaromatichydrocarbondegradation	3.04959			-
HumanDiseases.InfectiousDiseases	3.56871			-
GeneticInformationProcessing.Translation.mRNAsurveillancepathway	0			-
Metabolism.MetabolismofOtherAminoAcids.Phosphonateandphosphinatemetabolism	2.76136			-
Unclassified	5.15646			-
Metabolism.XenobioticsBiodegradationandMetabolism.Dioxindegradation	2.71053			-
Metabolism.EnergyMetabolism.Methanemetabolism	4.0922			-
Metabolism.BiosynthesisofOtherSecondaryMetabolites	3.96307			-
Unclassified.CellularProcessesandSignaling.Otherion_coupledtransporters	4.10499			-
HumanDiseases.Cancers.Colorectalcancer	0			-
OrganismalSystems.ExcretorySystem	2.45907			-
Metabolism.MetabolismofTerpenoidsandPolyketides.Zeatinbiosynthesis	2.69766			-
HumanDiseases.CardiovascularDiseases	0			-
EnvironmentalInformationProcessing.MembraneTransport.ABCtransporters	4.55268			-
EnvironmentalInformationProcessing	5.16825			-
Metabolism.EnergyMetabolism	4.75122			-
Metabolism.XenobioticsBiodegradationandMetabolism.1_1_1_Trichloro_2_2_bis_4_chlorophenyl_ethane_DDT_degradation	0.600585			-
HumanDiseases.InfectiousDiseases.Vibriocholeraeinfection	0			-
Metabolism.AminoAcidMetabolism.Tyrosinemetabolism	3.51168			-
HumanDiseases.NeurodegenerativeDiseases	2.97575			-
Unclassified.Metabolism.Biosynthesisandbiodegradationofsecondarymetabolites	2.86712			-
EnvironmentalInformationProcessing.SignalTransduction.MAPKsignalingpathway_yeast	2.63425			-
Metabolism.MetabolismofCofactorsandVitamins.VitaminB6metabolism	3.28147			-
CellularProcesses.CellGrowthandDeath.Apoptosis	0.5217			-
OrganismalSystems.NervousSystem.Glutamatergicsynapse	3.02233			-
Metabolism.AminoAcidMetabolism.Cysteineandmethioninemetabolism	3.98311			-
OrganismalSystems.ImmuneSystem.CytosolicDNA_sensingpathway	0			-
Metabolism.XenobioticsBiodegradationandMetabolism.Naphthalenedegradation	3.14028			-
OrganismalSystems.SensorySystem.Olfactorytransduction	0			-
HumanDiseases.InfectiousDiseases.Pertussis	2.30077			-
OrganismalSystems.EndocrineSystem.Adipocytokinesignalingpathway	2.80955			-
CellularProcesses.TransportandCatabolism	3.45109			-
Metabolism.XenobioticsBiodegradationandMetabolism.Styrenedegradation	2.33772			-
Metabolism.EnergyMetabolism.Sulfurmetabolism	3.45951			-
OrganismalSystems.DigestiveSystem	2.42093			-
Unclassified.GeneticInformationProcessing	4.42302			-
OrganismalSystems.EndocrineSystem.Renin_angiotensinsystem	0			-
EnvironmentalInformationProcessing.SignalTransduction.ErbBsignalingpathway	0			-
OrganismalSystems.ImmuneSystem	2.92458			-
OrganismalSystems.ExcretorySystem.Endocrineandotherfactor_regulatedcalciumreabsorption	0			-
Metabolism.NucleotideMetabolism.Pyrimidinemetabolism	4.25947			-

## Sheet: MotherSecretorStatus
KEGG Functional Group	log Class Average	Class	LDA Effect Size	p
Metabolism.MetabolismofCofactorsandVitamins.VitaminB6metabolism	3.30153	N	2.0836	0.0348085
OrganismalSystems.EndocrineSystem.PPARsignalingpathway	3.06435	N	2.08586	0.0119847
HumanDiseases.InfectiousDiseases.Vibriocholeraepathogeniccycle	2.84093	N	2.10139	0.0444232
OrganismalSystems.DigestiveSystem	2.58008	N	2.1033	0.00665561
Unclassified.CellularProcessesandSignaling.Othertransporters	3.44138	N	2.10724	0.0158613
OrganismalSystems.EndocrineSystem.Adipocytokinesignalingpathway	2.8717	N	2.11134	0.00356134
Unclassified.Metabolism.Glycanbiosynthesisandmetabolism	2.49152	N	2.11539	0.0158613
EnvironmentalInformationProcessing.SignalingMoleculesandInteraction.Cellularantigens	2.55374	N	2.17011	0.0119847
Metabolism.GlycanBiosynthesisandMetabolism.Glycosphingolipidbiosynthesis_globoseries	3.08233	N	2.17601	0.0208005
OrganismalSystems.DigestiveSystem.Proteindigestionandabsorption	2.28459	N	2.17632	0.00665561
Metabolism.BiosynthesisofOtherSecondaryMetabolites.Flavoneandflavonolbiosynthesis	1.95601	N	2.2176	0.0208005
CellularProcesses.TransportandCatabolism.Peroxisome	3.23099	N	2.27661	0.00256883
OrganismalSystems.EndocrineSystem	3.50661	N	2.29362	0.0270301
OrganismalSystems.DigestiveSystem.Mineralabsorption	1.76424	N	2.39583	0.0348085
Metabolism.MetabolismofOtherAminoAcids.Cyanoaminoacidmetabolism	3.47647	N	2.42732	0.0348085
Metabolism.EnergyMetabolism.Carbonfixationpathwaysinprokaryotes	3.99493	N	2.43808	0.0348085
Metabolism.CarbohydrateMetabolism.Aminosugarandnucleotidesugarmetabolism	4.17577	N	2.59397	0.0208005
Metabolism.CarbohydrateMetabolism.Pentoseandglucuronateinterconversions	3.78493	N	2.62791	0.0444232
Unclassified.Metabolism.Energymetabolism	3.95933	N	2.63025	0.00897255
Unclassified.Metabolism	4.42103	N	2.63928	0.0444232
Unclassified.PoorlyCharacterized.Generalfunctionpredictiononly	4.56304	N	2.73707	0.00356134
Metabolism.LipidMetabolism.Glycerolipidmetabolism	3.64459	S	2.40123	0.0208005
EnvironmentalInformationProcessing.MembraneTransport	5.11527	S	3.63513	0.0444232
EnvironmentalInformationProcessing	5.1692	S	3.65569	0.0348085
CellularProcesses.CellGrowthandDeath.Cellcycle	0			-
GeneticInformationProcessing.Transcription.Basaltranscriptionfactors	1.39175			-
HumanDiseases.Cancers.Renalcellcarcinoma	2.09227			-
OrganismalSystems.ImmuneSystem.Hematopoieticcelllineage	0			-
EnvironmentalInformationProcessing.SignalTransduction.Phosphatidylinositolsignalingsystem	2.93733			-
Metabolism.AminoAcidMetabolism.Lysinedegradation	3.14604			-
HumanDiseases.InfectiousDiseases.Bacterialinvasionofepithelialcells	0.966622			-
Metabolism.MetabolismofTerpenoidsandPolyketides.Tetracyclinebiosynthesis	3.18427			-
Unclassified.GeneticInformationProcessing.Replication_recombinationandrepairproteins	3.92043			-
Metabolism.MetabolismofOtherAminoAcids.Selenocompoundmetabolism	3.56416			-
CellularProcesses.CellGrowthandDeath.p53signalingpathway	0			-
HumanDiseases.ImmuneSystemDiseases.Primaryimmunodeficiency	2.57668			-
HumanDiseases.InfectiousDiseases.Shigellosis	0.562669			-
HumanDiseases.Cancers.Bladdercancer	0.911879			-
GeneticInformationProcessing.Folding_SortingandDegradation.Proteinprocessinginendoplasmicreticulum	2.83459			-
HumanDiseases	3.84329			-
GeneticInformationProcessing.Folding_SortingandDegradation.Proteinexport	3.7738			-
Metabolism.MetabolismofOtherAminoAcids.D_GlutamineandD_glutamatemetabolism	3.17323			-
EnvironmentalInformationProcessing.SignalTransduction.Calciumsignalingpathway	0			-
Metabolism.MetabolismofOtherAminoAcids.Glutathionemetabolism	3.25191			-
OrganismalSystems.EnvironmentalAdaptation	3.22688			-
Metabolism.EnzymeFamilies.CytochromeP450	0			-
Metabolism.BiosynthesisofOtherSecondaryMetabolites.Penicillinandcephalosporinbiosynthesis	2.49159			-
OrganismalSystems.CirculatorySystem	0			-
HumanDiseases.InfectiousDiseases.InfluenzaA	0			-
OrganismalSystems	3.86509			-
HumanDiseases.CardiovascularDiseases.Dilatedcardiomyopathy_DCM_	0			-
Metabolism.LipidMetabolism.Linoleicacidmetabolism	2.87337			-
Metabolism.CarbohydrateMetabolism.Glyoxylateanddicarboxylatemetabolism	3.73124			-
EnvironmentalInformationProcessing.SignalingMoleculesandInteraction.Neuroactiveligand_receptorinteraction	0			-
Unclassified.Metabolism.Nucleotidemetabolism	2.66403			-
Metabolism.MetabolismofOtherAminoAcids.D_ArginineandD_ornithinemetabolism	1.81398			-
CellularProcesses.CellGrowthandDeath	3.70151			-
CellularProcesses	4.4129			-
Metabolism.GlycanBiosynthesisandMetabolism.Glycosphingolipidbiosynthesis_ganglioseries	2.76887			-
Unclassified.CellularProcessesandSignaling.Sporulation	3.92916			-
OrganismalSystems.EnvironmentalAdaptation.Plant_pathogeninteraction	3.21338			-
Metabolism.AminoAcidMetabolism.Phenylalaninemetabolism	3.27306			-
EnvironmentalInformationProcessing.SignalingMoleculesandInteraction.Glycanbindngproteins	0			-
Metabolism.BiosynthesisofOtherSecondaryMetabolites.Stilbenoid_diarylheptanoidandgingerolbiosynthesis	0.599294			-
CellularProcesses.TransportandCatabolism.Lysosome	3.16159			-
Metabolism.GlycanBiosynthesisandMetabolism.Glycosaminoglycandegradation	2.98512			-
OrganismalSystems.DigestiveSystem.Gastricacidsecretion	0			-
GeneticInformationProcessing.ReplicationandRepair.Nucleotideexcisionrepair	3.60362			-
Metabolism.GlycanBiosynthesisandMetabolism.Peptidoglycanbiosynthesis	3.91274			-
Metabolism.MetabolismofCofactorsandVitamins.Ubiquinoneandotherterpenoid_quinonebiosynthesis	3.17041			-
CellularProcesses.CellGrowthandDeath.Cellcycle_Caulobacter	3.69622			-
HumanDiseases.CardiovascularDiseases.Arrhythmogenicrightventricularcardiomyopathy_ARVC_	0			-
CellularProcesses.CellMotility.Flagellarassembly	3.42421			-
Metabolism.MetabolismofCofactorsandVitamins.Thiaminemetabolism	3.71719			-
Metabolism.MetabolismofCofactorsandVitamins.Porphyrinandchlorophyllmetabolism	4.02118			-
HumanDiseases.Cancers.Pathwaysincancer	2.70041			-
Metabolism.LipidMetabolism.Etherlipidmetabolism	1.20561			-
Unclassified.Metabolism.Metabolismofcofactorsandvitamins	3.09444			-
CellularProcesses.TransportandCatabolism.Endocytosis	0			-
HumanDiseases.Cancers.Pancreaticcancer	0			-
Unclassified.GeneticInformationProcessing.Transcriptionrelatedproteins	2.14017			-
Metabolism.LipidMetabolism.alpha_Linolenicacidmetabolism	1.48979			-
EnvironmentalInformationProcessing.SignalingMoleculesandInteraction.Ionchannels	2.23305			-
Metabolism.MetabolismofCofactorsandVitamins.PantothenateandCoAbiosynthesis	3.80722			-
Metabolism.GlycanBiosynthesisandMetabolism	4.38565			-
Metabolism.MetabolismofTerpenoidsandPolyketides.Biosynthesisofansamycins	3.13356			-
HumanDiseases.Cancers	3.00522			-
Metabolism.GlycanBiosynthesisandMetabolism.OthertypesofO_glycanbiosynthesis	0			-
HumanDiseases.InfectiousDiseases.EpithelialcellsignalinginHelicobacterpyloriinfection	2.96024			-
Metabolism.CarbohydrateMetabolism.Propanoatemetabolism	3.70714			-
HumanDiseases.InfectiousDiseases.Amoebiasis	2.14272			-
Unclassified.CellularProcessesandSignaling	4.63108			-
Metabolism.XenobioticsBiodegradationandMetabolism.Bisphenoldegradation	2.95044			-
Metabolism.LipidMetabolism.Fattyacidmetabolism	3.36411			-
Unclassified.CellularProcessesandSignaling.Celldivision	2.82467			-
Metabolism.LipidMetabolism.Steroidbiosynthesis	2.18976			-
Metabolism.LipidMetabolism.Synthesisanddegradationofketonebodies	2.48444			-
HumanDiseases.Cancers.Chronicmyeloidleukemia	0			-
Metabolism.LipidMetabolism.Lipidbiosynthesisproteins	3.78421			-
OrganismalSystems.EndocrineSystem.Insulinsignalingpathway	2.98128			-
OrganismalSystems.SensorySystem.Phototransduction	0			-
Metabolism.GlycanBiosynthesisandMetabolism.Glycosphingolipidbiosynthesis_lactoandneolactoseries	0.275862			-
Metabolism.BiosynthesisofOtherSecondaryMetabolites.Flavonoidbiosynthesis	2.03607			-
HumanDiseases.NeurodegenerativeDiseases.Priondiseases	1.60601			-
EnvironmentalInformationProcessing.SignalingMoleculesandInteraction.Gprotein_coupledreceptors	0			-
EnvironmentalInformationProcessing.SignalingMoleculesandInteraction.Cytokine_cytokinereceptorinteraction	0			-
Metabolism.EnzymeFamilies.Peptidases	4.26949			-
OrganismalSystems.ImmuneSystem.NOD_likereceptorsignalingpathway	2.62579			-
Metabolism.AminoAcidMetabolism.Valine_leucineandisoleucinedegradation	3.33033			-
HumanDiseases.Cancers.Glioma	0			-
Metabolism.CarbohydrateMetabolism.Butanoatemetabolism	3.7923			-
OrganismalSystems.ImmuneSystem.Antigenprocessingandpresentation	2.61008			-
Metabolism.LipidMetabolism.Secondarybileacidbiosynthesis	2.57239			-
Metabolism.EnzymeFamilies	4.33331			-
Unclassified.CellularProcessesandSignaling.Cellmotilityandsecretion	3.34332			-
OrganismalSystems.DigestiveSystem.Pancreaticsecretion	0			-
Unclassified.CellularProcessesandSignaling.Inorganiciontransportandmetabolism	3.34872			-
Metabolism.XenobioticsBiodegradationandMetabolism.Benzoatedegradation	3.31672			-
EnvironmentalInformationProcessing.MembraneTransport.Bacterialsecretionsystem	3.80569			-
GeneticInformationProcessing.ReplicationandRepair.Homologousrecombination	3.96621			-
Metabolism.MetabolismofTerpenoidsandPolyketides.Prenyltransferases	3.49972			-
Metabolism.MetabolismofTerpenoidsandPolyketides.Terpenoidbackbonebiosynthesis	3.76681			-
CellularProcesses.CellGrowthandDeath.Cellcycle_yeast	0			-
GeneticInformationProcessing.Folding_SortingandDegradation.Proteasome	2.61966			-
OrganismalSystems.NervousSystem	3.03987			-
Unclassified.Metabolism.Lipidmetabolism	3.17349			-
GeneticInformationProcessing.ReplicationandRepair.Baseexcisionrepair	3.65675			-
CellularProcesses.CellCommunication.Adherensjunction	0			-
Metabolism.AminoAcidMetabolism.Lysinebiosynthesis	3.93549			-
Metabolism.AminoAcidMetabolism.Histidinemetabolism	3.79348			-
Unclassified.PoorlyCharacterized.Functionunknown	4.10828			-
Metabolism.EnergyMetabolism.Photosynthesis	3.59641			-
Metabolism.LipidMetabolism.Glycerophospholipidmetabolism	3.78003			-
HumanDiseases.ImmuneSystemDiseases.Systemiclupuserythematosus	1.71243			-
EnvironmentalInformationProcessing.SignalTransduction.Hedgehogsignalingpathway	0			-
Metabolism.XenobioticsBiodegradationandMetabolism.Caprolactamdegradation	2.56866			-
EnvironmentalInformationProcessing.SignalTransduction.MAPKsignalingpathway	0			-
Metabolism.BiosynthesisofOtherSecondaryMetabolites.Phenylpropanoidbiosynthesis	3.24617			-
OrganismalSystems.SensorySystem.Phototransduction_fly	0			-
GeneticInformationProcessing.Translation	4.75719			-
Metabolism.CarbohydrateMetabolism.C5_Brancheddibasicacidmetabolism	3.49918			-
Metabolism.BiosynthesisofOtherSecondaryMetabolites.beta_Lactamresistance	2.48911			-
CellularProcesses.CellCommunication.Tightjunction	0			-
HumanDiseases.InfectiousDiseases.Toxoplasmosis	0			-
Metabolism.MetabolismofCofactorsandVitamins.Lipoicacidmetabolism	2.48741			-
Metabolism.MetabolismofCofactorsandVitamins.Folatebiosynthesis	3.58038			-
Metabolism.LipidMetabolism.Primarybileacidbiosynthesis	2.5782			-
Metabolism.MetabolismofOtherAminoAcids	4.15531			-
Metabolism.AminoAcidMetabolism.Arginineandprolinemetabolism	4.10228			-
Metabolism.XenobioticsBiodegradationandMetabolism.Ethylbenzenedegradation	2.62857			-
EnvironmentalInformationProcessing.SignalingMoleculesandInteraction.Bacterialtoxins	3.11681			-
OrganismalSystems.NervousSystem.Long_termpotentiation	0			-
Metabolism.AminoAcidMetabolism.Phenylalanine_tyrosineandtryptophanbiosynthesis	3.94375			-
OrganismalSystems.EndocrineSystem.GnRHsignalingpathway	0			-
Metabolism.MetabolismofTerpenoidsandPolyketides.BiosynthesisoftypeIIpolyketidebackbone	0			-
HumanDiseases.MetabolicDiseases.TypeIdiabetesmellitus	2.72345			-
HumanDiseases.NeurodegenerativeDiseases.Huntingtonsdisease	2.41873			-
Metabolism.CarbohydrateMetabolism.Fructoseandmannosemetabolism	4.02093			-
GeneticInformationProcessing.Transcription.RNApolymerase	3.23574			-
Metabolism.MetabolismofTerpenoidsandPolyketides.Polyketidesugarunitbiosynthesis	3.32139			-
GeneticInformationProcessing.Translation.Ribosomebiogenesisineukaryotes	2.6713			-
CellularProcesses.CellGrowthandDeath.Meiosis_yeast	2.03471			-
OrganismalSystems.DigestiveSystem.Salivarysecretion	0			-
Metabolism.CarbohydrateMetabolism	5.04186			-
GeneticInformationProcessing.Translation.RibosomeBiogenesis	4.15731			-
Metabolism.EnergyMetabolism.Photosynthesisproteins	3.59813			-
Metabolism.CarbohydrateMetabolism.Pentosephosphatepathway	3.98468			-
Metabolism.XenobioticsBiodegradationandMetabolism.Nitrotoluenedegradation	2.91586			-
Metabolism.XenobioticsBiodegradationandMetabolism	4.21031			-
GeneticInformationProcessing.ReplicationandRepair.Chromosome	4.19074			-
Metabolism.LipidMetabolism.Biosynthesisofunsaturatedfattyacids	3.19288			-
Metabolism.MetabolismofTerpenoidsandPolyketides.Geranioldegradation	2.64452			-
GeneticInformationProcessing.ReplicationandRepair.DNAreplicationproteins	4.08614			-
Unclassified.Metabolism.Carbohydratemetabolism	3.29581			-
CellularProcesses.CellGrowthandDeath.Oocytemeiosis	0			-
Metabolism.GlycanBiosynthesisandMetabolism.Otherglycandegradation	3.52593			-
Metabolism.LipidMetabolism.Fattyacidbiosynthesis	3.69577			-
Metabolism.AminoAcidMetabolism.Tryptophanmetabolism	3.142			-
Metabolism.BiosynthesisofOtherSecondaryMetabolites.Novobiocinbiosynthesis	3.12434			-
Unclassified.CellularProcessesandSignaling.Signaltransductionmechanisms	3.71447			-
Metabolism.MetabolismofCofactorsandVitamins.Nicotinateandnicotinamidemetabolism	3.62241			-
OrganismalSystems.CirculatorySystem.Cardiacmusclecontraction	0			-
EnvironmentalInformationProcessing.SignalTransduction	4.19172			-
Metabolism.NucleotideMetabolism.Purinemetabolism	4.34523			-
Metabolism.LipidMetabolism.Fattyacidelongationinmitochondria	1.71238			-
GeneticInformationProcessing.Translation.Ribosome	4.36934			-
Metabolism.XenobioticsBiodegradationandMetabolism.Xylenedegradation	2.70426			-
Metabolism.CarbohydrateMetabolism.Pyruvatemetabolism	4.02494			-
EnvironmentalInformationProcessing.SignalingMoleculesandInteraction	3.23807			-
Metabolism.MetabolismofCofactorsandVitamins.Biotinmetabolism	3.19105			-
Metabolism.XenobioticsBiodegradationandMetabolism.Toluenedegradation	2.96661			-
Metabolism.XenobioticsBiodegradationandMetabolism.Atrazinedegradation	2.59977			-
Metabolism.MetabolismofCofactorsandVitamins.Retinolmetabolism	2.41211			-
Unclassified.Metabolism.Others	3.96997			-
Metabolism.AminoAcidMetabolism.Alanine_aspartateandglutamatemetabolism	4.03229			-
Metabolism.EnzymeFamilies.Proteinkinases	3.49375			-
Metabolism.CarbohydrateMetabolism.Starchandsucrosemetabolism	4.03901			-
Metabolism.CarbohydrateMetabolism.Ascorbateandaldaratemetabolism	3.08074			-
Unclassified.PoorlyCharacterized	4.68916			-
Metabolism.XenobioticsBiodegradationandMetabolism.Aminobenzoatedegradation	3.06912			-
HumanDiseases.Cancers.Prostatecancer	2.63489			-
HumanDiseases.NeurodegenerativeDiseases.Amyotrophiclateralsclerosis_ALS_	1.95434			-
Metabolism.BiosynthesisofOtherSecondaryMetabolites.Isoflavonoidbiosynthesis	0			-
Unclassified.CellularProcessesandSignaling.Membraneandintracellularstructuralmolecules	3.72538			-
Unclassified.GeneticInformationProcessing.Translationproteins	3.97142			-
HumanDiseases.InfectiousDiseases.Leishmaniasis	0			-
HumanDiseases.MetabolicDiseases.TypeIIdiabetesmellitus	2.68067			-
Metabolism.LipidMetabolism.Sphingolipidmetabolism	3.43414			-
Metabolism.CarbohydrateMetabolism.Inositolphosphatemetabolism	2.99394			-
EnvironmentalInformationProcessing.SignalTransduction.Wntsignalingpathway	0			-
OrganismalSystems.EndocrineSystem.Melanogenesis	0			-
Unclassified.GeneticInformationProcessing.Restrictionenzyme	3.31086			-
Unclassified.GeneticInformationProcessing.Proteinfoldingandassociatedprocessing	3.82747			-
GeneticInformationProcessing.ReplicationandRepair.Mismatchrepair	3.91006			-
OrganismalSystems.ImmuneSystem.Complementandcoagulationcascades	0			-
GeneticInformationProcessing.Translation.Translationfactors	3.73204			-
EnvironmentalInformationProcessing.SignalingMoleculesandInteraction.CAMligands	0			-
HumanDiseases.InfectiousDiseases.Chagasdisease_Americantrypanosomiasis_	1.78337			-
Metabolism.EnergyMetabolism.Nitrogenmetabolism	3.83634			-
HumanDiseases.ImmuneSystemDiseases.Rheumatoidarthritis	0			-
CellularProcesses.TransportandCatabolism.Phagosome	0			-
Metabolism.BiosynthesisofOtherSecondaryMetabolites.Caffeinemetabolism	1.71246			-
Metabolism.EnergyMetabolism.Oxidativephosphorylation	4.03871			-
Metabolism.GlycanBiosynthesisandMetabolism.N_Glycanbiosynthesis	2.42874			-
Metabolism.AminoAcidMetabolism	4.98621			-
Metabolism.LipidMetabolism.Arachidonicacidmetabolism	2.36763			-
Metabolism.MetabolismofOtherAminoAcids.beta_Alaninemetabolism	3.22792			-
Unclassified.CellularProcessesandSignaling.Electrontransfercarriers	2.39686			-
Metabolism.CarbohydrateMetabolism.Glycolysis_Gluconeogenesis	4.06667			-
Metabolism	5.6807			-
EnvironmentalInformationProcessing.SignalTransduction.VEGFsignalingpathway	0			-
Metabolism.XenobioticsBiodegradationandMetabolism.MetabolismofxenobioticsbycytochromeP450	2.39379			-
Metabolism.MetabolismofTerpenoidsandPolyketides.Limoneneandpinenedegradation	2.94607			-
HumanDiseases.CardiovascularDiseases.Hypertrophiccardiomyopathy_HCM_	0			-
OrganismalSystems.EnvironmentalAdaptation.Circadianrhythm_plant	1.7128			-
EnvironmentalInformationProcessing.SignalingMoleculesandInteraction.Cytokinereceptors	0			-
HumanDiseases.NeurodegenerativeDiseases.Alzheimersdisease	2.7108			-
Metabolism.GlycanBiosynthesisandMetabolism.Glycosyltransferases	3.5437			-
Metabolism.GlycanBiosynthesisandMetabolism.VarioustypesofN_glycanbiosynthesis	0			-
CellularProcesses.CellCommunication.Focaladhesion	0			-
Metabolism.MetabolismofTerpenoidsandPolyketides.Biosynthesisof12__14_and16_memberedmacrolides	0			-
EnvironmentalInformationProcessing.MembraneTransport.Transporters	4.85374			-
Metabolism.GlycanBiosynthesisandMetabolism.Lipopolysaccharidebiosynthesisproteins	3.57344			-
Metabolism.MetabolismofOtherAminoAcids.Taurineandhypotaurinemetabolism	3.01877			-
GeneticInformationProcessing.Translation.Aminoacyl_tRNAbiosynthesis	4.09059			-
Metabolism.MetabolismofCofactorsandVitamins.Onecarbonpoolbyfolate	3.79824			-
Metabolism.MetabolismofCofactorsandVitamins	4.63849			-
GeneticInformationProcessing.Transcription.Spliceosome	0			-
CellularProcesses.CellMotility.Cytoskeletonproteins	3.59527			-
OrganismalSystems.CirculatorySystem.Vascularsmoothmusclecontraction	0			-
EnvironmentalInformationProcessing.MembraneTransport.Secretionsystem	4.08083			-
GeneticInformationProcessing.Folding_SortingandDegradation	4.38641			-
GeneticInformationProcessing.Transcription	4.47013			-
Metabolism.MetabolismofTerpenoidsandPolyketides.Biosynthesisofsiderophoregroupnonribosomalpeptides	2.31689			-
GeneticInformationProcessing.Transcription.Transcriptionmachinery	4.02771			-
GeneticInformationProcessing.ReplicationandRepair	4.94699			-
Metabolism.XenobioticsBiodegradationandMetabolism.Chloroalkaneandchloroalkenedegradation	3.27111			-
EnvironmentalInformationProcessing.SignalTransduction.mTORsignalingpathway	0			-
OrganismalSystems.DigestiveSystem.Bilesecretion	0.101777			-
Metabolism.EnergyMetabolism.Photosynthesis_antennaproteins	0.112154			-
OrganismalSystems.EndocrineSystem.Progesterone_mediatedoocytematuration	2.61008			-
Metabolism.BiosynthesisofOtherSecondaryMetabolites.Clavulanicacidbiosynthesis	0			-
Unclassified.CellularProcessesandSignaling.Germination	2.59966			-
Metabolism.LipidMetabolism.Steroidhormonebiosynthesis	2.54512			-
HumanDiseases.NeurodegenerativeDiseases.Parkinsonsdisease	0.212807			-
HumanDiseases.Cancers.Smallcelllungcancer	0			-
Metabolism.MetabolismofOtherAminoAcids.D_Alaninemetabolism	3.01514			-
Unclassified.Metabolism.Aminoacidmetabolism	3.31033			-
OrganismalSystems.ExcretorySystem.Vasopressin_regulatedwaterreabsorption	0			-
Metabolism.BiosynthesisofOtherSecondaryMetabolites.Streptomycinbiosynthesis	3.52349			-
GeneticInformationProcessing.Folding_SortingandDegradation.Chaperonesandfoldingcatalysts	3.99761			-
OrganismalSystems.ImmuneSystem.FcepsilonRIsignalingpathway	0			-
OrganismalSystems.NervousSystem.Neurotrophinsignalingpathway	0			-
Unclassified.CellularProcessesandSignaling.Poresionchannels	3.54563			-
Metabolism.CarbohydrateMetabolism.Citratecycle_TCAcycle_	3.77188			-
OrganismalSystems.ExcretorySystem.Aldosterone_regulatedsodiumreabsorption	0			-
Metabolism.XenobioticsBiodegradationandMetabolism.Drugmetabolism_cytochromeP450	2.47914			-
EnvironmentalInformationProcessing.MembraneTransport.Phosphotransferasesystem_PTS_	3.7066			-
HumanDiseases.InfectiousDiseases.Staphylococcusaureusinfection	1.64929			-
HumanDiseases.MetabolicDiseases	3.00361			-
Metabolism.LipidMetabolism	4.47686			-
EnvironmentalInformationProcessing.SignalTransduction.Two_componentsystem	4.15476			-
GeneticInformationProcessing.Folding_SortingandDegradation.RNAdegradation	3.67657			-
Metabolism.XenobioticsBiodegradationandMetabolism.Chlorocyclohexaneandchlorobenzenedegradation	2.2433			-
GeneticInformationProcessing.Folding_SortingandDegradation.Ubiquitinsystem	1.89566			-
EnvironmentalInformationProcessing.SignalingMoleculesandInteraction.GTP_bindingproteins	0			-
CellularProcesses.CellMotility	4.26471			-
HumanDiseases.CardiovascularDiseases.Viralmyocarditis	0			-
Metabolism.BiosynthesisofOtherSecondaryMetabolites.Tropane_piperidineandpyridinealkaloidbiosynthesis	3.06999			-
Metabolism.GlycanBiosynthesisandMetabolism.Lipopolysaccharidebiosynthesis	3.4237			-
Metabolism.XenobioticsBiodegradationandMetabolism.Fluorobenzoatedegradation	2.03092			-
Metabolism.MetabolismofTerpenoidsandPolyketides.Biosynthesisofvancomycingroupantibiotics	2.79107			-
OrganismalSystems.NervousSystem.Long_termdepression	0			-
EnvironmentalInformationProcessing.SignalTransduction.TGF_betasignalingpathway	0			-
Metabolism.MetabolismofTerpenoidsandPolyketides.BiosynthesisoftypeIIpolyketideproducts	0			-
Metabolism.AminoAcidMetabolism.Glycine_serineandthreoninemetabolism	3.91542			-
OrganismalSystems.SensorySystem	0			-
Metabolism.AminoAcidMetabolism.Valine_leucineandisoleucinebiosynthesis	3.8869			-
Metabolism.XenobioticsBiodegradationandMetabolism.Drugmetabolism_otherenzymes	3.52614			-
OrganismalSystems.ImmuneSystem.FcgammaR_mediatedphagocytosis	0			-
GeneticInformationProcessing.Translation.RNAtransport	3.16806			-
Metabolism.CarbohydrateMetabolism.Galactosemetabolism	3.92096			-
Metabolism.GlycanBiosynthesisandMetabolism.Glycosylphosphatidylinositol_GPI__anchorbiosynthesis	0			-
OrganismalSystems.DigestiveSystem.Carbohydratedigestionandabsorption	2.10829			-
OrganismalSystems.NervousSystem.Cholinergicsynapse	0			-
Metabolism.BiosynthesisofOtherSecondaryMetabolites.Butirosinandneomycinbiosynthesis	2.92649			-
EnvironmentalInformationProcessing.SignalingMoleculesandInteraction.ECM_receptorinteraction	0			-
CellularProcesses.CellMotility.Bacterialchemotaxis	3.59081			-
OrganismalSystems.ImmuneSystem.RIG_I_likereceptorsignalingpathway	1.42492			-
HumanDiseases.ImmuneSystemDiseases	2.62737			-
HumanDiseases.InfectiousDiseases.PathogenicEscherichiacoliinfection	0.957135			-
CellularProcesses.CellMotility.Bacterialmotilityproteins	3.8984			-
Metabolism.MetabolismofTerpenoidsandPolyketides.Carotenoidbiosynthesis	1.97163			-
Metabolism.BiosynthesisofOtherSecondaryMetabolites.Indolealkaloidbiosynthesis	0			-
OrganismalSystems.DigestiveSystem.Fatdigestionandabsorption	0			-
Metabolism.AminoAcidMetabolism.Aminoacidrelatedenzymes	4.17558			-
HumanDiseases.InfectiousDiseases.Africantrypanosomiasis	1.82195			-
GeneticInformationProcessing.ReplicationandRepair.Non_homologousend_joining	2.37988			-
GeneticInformationProcessing.ReplicationandRepair.DNArepairandrecombinationproteins	4.45491			-
Metabolism.BiosynthesisofOtherSecondaryMetabolites.Betalainbiosynthesis	0			-
HumanDiseases.InfectiousDiseases.Measles	0			-
HumanDiseases.InfectiousDiseases.HepatitisC	0			-
Metabolism.MetabolismofTerpenoidsandPolyketides.Sesquiterpenoidbiosynthesis	0			-
Metabolism.BiosynthesisofOtherSecondaryMetabolites.Isoquinolinealkaloidbiosynthesis	2.74064			-
CellularProcesses.CellCommunication	0			-
CellularProcesses.CellMotility.Regulationofactincytoskeleton	0			-
HumanDiseases.InfectiousDiseases.Tuberculosis	3.2087			-
GeneticInformationProcessing.Folding_SortingandDegradation.Sulfurrelaysystem	3.44484			-
Metabolism.MetabolismofTerpenoidsandPolyketides	4.2162			-
GeneticInformationProcessing.ReplicationandRepair.DNAreplication	3.81065			-
Metabolism.GlycanBiosynthesisandMetabolism.Glycosaminoglycanbiosynthesis_chondroitinsulfate	0			-
OrganismalSystems.ImmuneSystem.Leukocytetransendothelialmigration	0			-
GeneticInformationProcessing.Transcription.Transcriptionfactors	4.24336			-
Metabolism.EnergyMetabolism.Carbonfixationinphotosyntheticorganisms	3.83317			-
Metabolism.MetabolismofCofactorsandVitamins.Riboflavinmetabolism	3.36774			-
Metabolism.NucleotideMetabolism	4.60557			-
OrganismalSystems.ExcretorySystem.Proximaltubulebicarbonatereclamation	2.48451			-
EnvironmentalInformationProcessing.SignalTransduction.Notchsignalingpathway	0			-
GeneticInformationProcessing	5.2987			-
Metabolism.XenobioticsBiodegradationandMetabolism.Polycyclicaromatichydrocarbondegradation	3.0585			-
HumanDiseases.InfectiousDiseases	3.56594			-
GeneticInformationProcessing.Translation.mRNAsurveillancepathway	0			-
Metabolism.MetabolismofOtherAminoAcids.Phosphonateandphosphinatemetabolism	2.78795			-
Unclassified	5.15796			-
Metabolism.XenobioticsBiodegradationandMetabolism.Dioxindegradation	2.71817			-
Metabolism.EnergyMetabolism.Methanemetabolism	4.0915			-
Metabolism.BiosynthesisofOtherSecondaryMetabolites	3.98994			-
Unclassified.CellularProcessesandSignaling.Otherion_coupledtransporters	4.12122			-
HumanDiseases.Cancers.Colorectalcancer	0			-
OrganismalSystems.ExcretorySystem	2.48451			-
Metabolism.MetabolismofTerpenoidsandPolyketides.Zeatinbiosynthesis	2.72859			-
HumanDiseases.CardiovascularDiseases	0			-
EnvironmentalInformationProcessing.MembraneTransport.ABCtransporters	4.54978			-
Metabolism.EnergyMetabolism	4.76003			-
Metabolism.XenobioticsBiodegradationandMetabolism.1_1_1_Trichloro_2_2_bis_4_chlorophenyl_ethane_DDT_degradation	0.252637			-
HumanDiseases.InfectiousDiseases.Vibriocholeraeinfection	0			-
Metabolism.AminoAcidMetabolism.Tyrosinemetabolism	3.51113			-
HumanDiseases.NeurodegenerativeDiseases	2.94126			-
Unclassified.Metabolism.Biosynthesisandbiodegradationofsecondarymetabolites	2.88908			-
EnvironmentalInformationProcessing.SignalTransduction.MAPKsignalingpathway_yeast	2.66129			-
CellularProcesses.CellGrowthandDeath.Apoptosis	0.468486			-
OrganismalSystems.NervousSystem.Glutamatergicsynapse	3.03987			-
Metabolism.AminoAcidMetabolism.Cysteineandmethioninemetabolism	3.98144			-
OrganismalSystems.ImmuneSystem.CytosolicDNA_sensingpathway	0			-
Metabolism.XenobioticsBiodegradationandMetabolism.Naphthalenedegradation	3.12843			-
OrganismalSystems.SensorySystem.Olfactorytransduction	0			-
HumanDiseases.InfectiousDiseases.Pertussis	2.39277			-
CellularProcesses.TransportandCatabolism	3.4987			-
Metabolism.XenobioticsBiodegradationandMetabolism.Styrenedegradation	2.33634			-
Metabolism.EnergyMetabolism.Sulfurmetabolism	3.47022			-
Unclassified.GeneticInformationProcessing	4.42039			-
OrganismalSystems.EndocrineSystem.Renin_angiotensinsystem	0			-
EnvironmentalInformationProcessing.SignalTransduction.ErbBsignalingpathway	0			-
OrganismalSystems.ImmuneSystem	2.93112			-
OrganismalSystems.ExcretorySystem.Endocrineandotherfactor_regulatedcalciumreabsorption	0			-
Metabolism.NucleotideMetabolism.Pyrimidinemetabolism	4.26293			-

## Sheet: MotherSecretorStatus_ABF
KEGG Functional Group	log Class Average	Class	LDA Effect Size	p
Unclassified.Metabolism.Glycanbiosynthesisandmetabolism	2.51299	N	2.01012	0.0236516
EnvironmentalInformationProcessing.SignalingMoleculesandInteraction.Cellularantigens	2.51673	N	2.04329	0.0477149
OrganismalSystems.EndocrineSystem.Adipocytokinesignalingpathway	2.85993	N	2.09365	0.0236516
Metabolism.MetabolismofTerpenoidsandPolyketides.Biosynthesisofvancomycingroupantibiotics	2.78969	N	2.1068	0.0338949
HumanDiseases.InfectiousDiseases.Vibriocholeraepathogeniccycle	2.87208	N	2.11147	0.0109095
OrganismalSystems.DigestiveSystem.Proteindigestionandabsorption	2.2654	N	2.17169	0.0236516
Metabolism.BiosynthesisofOtherSecondaryMetabolites.Flavoneandflavonolbiosynthesis	2.02407	N	2.18851	0.00467773
HumanDiseases.Cancers.Prostatecancer	2.65528	N	2.21745	0.0236516
OrganismalSystems.DigestiveSystem	2.61797	N	2.22122	0.0109095
Metabolism.GlycanBiosynthesisandMetabolism.Glycosphingolipidbiosynthesis_globoseries	3.07317	N	2.24271	0.0162095
CellularProcesses.TransportandCatabolism.Peroxisome	3.22655	N	2.32848	0.0162095
Metabolism.XenobioticsBiodegradationandMetabolism.Drugmetabolism_otherenzymes	3.54143	N	2.38503	0.0338949
Unclassified.CellularProcessesandSignaling.Othertransporters	3.44991	N	2.38903	0.0109095
Metabolism.MetabolismofOtherAminoAcids.Cyanoaminoacidmetabolism	3.48921	N	2.53918	0.0236516
Unclassified.Metabolism	4.4173	N	2.65915	0.0338949
Metabolism.CarbohydrateMetabolism.Pentoseandglucuronateinterconversions	3.79089	N	2.68885	0.0477149
Unclassified.Metabolism.Energymetabolism	3.97088	N	2.73173	0.0109095
Unclassified.PoorlyCharacterized.Generalfunctionpredictiononly	4.56284	N	2.8039	0.00720957
EnvironmentalInformationProcessing.SignalingMoleculesandInteraction.Bacterialtoxins	3.11396	S	2.00487	0.0338949
CellularProcesses.CellGrowthandDeath.Cellcycle	0			-
GeneticInformationProcessing.Transcription.Basaltranscriptionfactors	1.30926			-
HumanDiseases.Cancers.Renalcellcarcinoma	2.04508			-
OrganismalSystems.ImmuneSystem.Hematopoieticcelllineage	0			-
EnvironmentalInformationProcessing.SignalTransduction.Phosphatidylinositolsignalingsystem	2.92075			-
Metabolism.AminoAcidMetabolism.Lysinedegradation	3.12374			-
HumanDiseases.InfectiousDiseases.Bacterialinvasionofepithelialcells	0.997545			-
Metabolism.MetabolismofTerpenoidsandPolyketides.Tetracyclinebiosynthesis	3.18817			-
Unclassified.GeneticInformationProcessing.Replication_recombinationandrepairproteins	3.91248			-
Metabolism.MetabolismofOtherAminoAcids.Selenocompoundmetabolism	3.56184			-
CellularProcesses.CellGrowthandDeath.p53signalingpathway	0			-
HumanDiseases.ImmuneSystemDiseases.Primaryimmunodeficiency	2.60366			-
HumanDiseases.InfectiousDiseases.Shigellosis	0.699128			-
HumanDiseases.Cancers.Bladdercancer	0.917397			-
GeneticInformationProcessing.Folding_SortingandDegradation.Proteinprocessinginendoplasmicreticulum	2.80759			-
HumanDiseases	3.84057			-
GeneticInformationProcessing.Folding_SortingandDegradation.Proteinexport	3.78029			-
Metabolism.MetabolismofOtherAminoAcids.D_GlutamineandD_glutamatemetabolism	3.17368			-
EnvironmentalInformationProcessing.SignalTransduction.Calciumsignalingpathway	0			-
Metabolism.MetabolismofOtherAminoAcids.Glutathionemetabolism	3.23636			-
OrganismalSystems.EnvironmentalAdaptation	3.23112			-
Metabolism.EnzymeFamilies.CytochromeP450	0			-
Metabolism.BiosynthesisofOtherSecondaryMetabolites.Penicillinandcephalosporinbiosynthesis	2.39599			-
OrganismalSystems.CirculatorySystem	0			-
HumanDiseases.InfectiousDiseases.InfluenzaA	0			-
OrganismalSystems	3.8642			-
HumanDiseases.CardiovascularDiseases.Dilatedcardiomyopathy_DCM_	0			-
Metabolism.LipidMetabolism.Linoleicacidmetabolism	2.86931			-
Metabolism.EnergyMetabolism.Carbonfixationpathwaysinprokaryotes	3.99047			-
Metabolism.CarbohydrateMetabolism.Glyoxylateanddicarboxylatemetabolism	3.72661			-
EnvironmentalInformationProcessing.SignalingMoleculesandInteraction.Neuroactiveligand_receptorinteraction	0			-
Unclassified.Metabolism.Nucleotidemetabolism	2.67158			-
Metabolism.MetabolismofOtherAminoAcids.D_ArginineandD_ornithinemetabolism	1.82559			-
CellularProcesses.CellGrowthandDeath	3.70294			-
CellularProcesses	4.42505			-
Metabolism.GlycanBiosynthesisandMetabolism.Glycosphingolipidbiosynthesis_ganglioseries	2.73356			-
Unclassified.CellularProcessesandSignaling.Sporulation	3.951			-
OrganismalSystems.EnvironmentalAdaptation.Plant_pathogeninteraction	3.22256			-
Metabolism.AminoAcidMetabolism.Phenylalaninemetabolism	3.25671			-
EnvironmentalInformationProcessing.SignalingMoleculesandInteraction.Glycanbindngproteins	0			-
Metabolism.BiosynthesisofOtherSecondaryMetabolites.Stilbenoid_diarylheptanoidandgingerolbiosynthesis	0.732424			-
CellularProcesses.TransportandCatabolism.Lysosome	3.11459			-
Metabolism.GlycanBiosynthesisandMetabolism.Glycosaminoglycandegradation	2.92837			-
OrganismalSystems.DigestiveSystem.Gastricacidsecretion	0			-
GeneticInformationProcessing.ReplicationandRepair.Nucleotideexcisionrepair	3.60278			-
Metabolism.GlycanBiosynthesisandMetabolism.Peptidoglycanbiosynthesis	3.92023			-
Metabolism.MetabolismofCofactorsandVitamins.Ubiquinoneandotherterpenoid_quinonebiosynthesis	3.11352			-
CellularProcesses.CellGrowthandDeath.Cellcycle_Caulobacter	3.7			-
HumanDiseases.CardiovascularDiseases.Arrhythmogenicrightventricularcardiomyopathy_ARVC_	0			-
CellularProcesses.CellMotility.Flagellarassembly	3.48017			-
Metabolism.MetabolismofCofactorsandVitamins.Thiaminemetabolism	3.72355			-
Metabolism.MetabolismofCofactorsandVitamins.Porphyrinandchlorophyllmetabolism	4.03524			-
HumanDiseases.Cancers.Pathwaysincancer	2.68997			-
Metabolism.LipidMetabolism.Etherlipidmetabolism	1.2455			-
Unclassified.Metabolism.Metabolismofcofactorsandvitamins	3.06622			-
CellularProcesses.TransportandCatabolism.Endocytosis	0			-
HumanDiseases.Cancers.Pancreaticcancer	0			-
Unclassified.GeneticInformationProcessing.Transcriptionrelatedproteins	2.09824			-
Metabolism.LipidMetabolism.alpha_Linolenicacidmetabolism	1.49402			-
EnvironmentalInformationProcessing.SignalingMoleculesandInteraction.Ionchannels	2.14133			-
Metabolism.MetabolismofCofactorsandVitamins.PantothenateandCoAbiosynthesis	3.81012			-
Metabolism.GlycanBiosynthesisandMetabolism	4.355			-
Metabolism.MetabolismofTerpenoidsandPolyketides.Biosynthesisofansamycins	3.14522			-
HumanDiseases.Cancers	2.99501			-
Metabolism.GlycanBiosynthesisandMetabolism.OthertypesofO_glycanbiosynthesis	0			-
HumanDiseases.InfectiousDiseases.EpithelialcellsignalinginHelicobacterpyloriinfection	2.97316			-
Metabolism.CarbohydrateMetabolism.Propanoatemetabolism	3.70845			-
HumanDiseases.InfectiousDiseases.Amoebiasis	2.07104			-
Unclassified.CellularProcessesandSignaling	4.62387			-
Metabolism.XenobioticsBiodegradationandMetabolism.Bisphenoldegradation	2.9464			-
Metabolism.LipidMetabolism.Fattyacidmetabolism	3.35715			-
Unclassified.CellularProcessesandSignaling.Celldivision	2.82743			-
Metabolism.LipidMetabolism.Steroidbiosynthesis	1.99816			-
Metabolism.LipidMetabolism.Synthesisanddegradationofketonebodies	2.47899			-
HumanDiseases.Cancers.Chronicmyeloidleukemia	0			-
Metabolism.LipidMetabolism.Lipidbiosynthesisproteins	3.78208			-
OrganismalSystems.EndocrineSystem.Insulinsignalingpathway	2.97983			-
OrganismalSystems.SensorySystem.Phototransduction	0			-
Metabolism.GlycanBiosynthesisandMetabolism.Glycosphingolipidbiosynthesis_lactoandneolactoseries	0.174496			-
Metabolism.BiosynthesisofOtherSecondaryMetabolites.Flavonoidbiosynthesis	1.96142			-
HumanDiseases.NeurodegenerativeDiseases.Priondiseases	1.56539			-
OrganismalSystems.EndocrineSystem.PPARsignalingpathway	3.0508			-
EnvironmentalInformationProcessing.SignalingMoleculesandInteraction.Gprotein_coupledreceptors	0			-
EnvironmentalInformationProcessing.SignalingMoleculesandInteraction.Cytokine_cytokinereceptorinteraction	0			-
Metabolism.CarbohydrateMetabolism.Aminosugarandnucleotidesugarmetabolism	4.17361			-
Metabolism.EnzymeFamilies.Peptidases	4.27271			-
OrganismalSystems.ImmuneSystem.NOD_likereceptorsignalingpathway	2.63382			-
Metabolism.AminoAcidMetabolism.Valine_leucineandisoleucinedegradation	3.31582			-
HumanDiseases.Cancers.Glioma	0			-
Metabolism.CarbohydrateMetabolism.Butanoatemetabolism	3.80307			-
OrganismalSystems.ImmuneSystem.Antigenprocessingandpresentation	2.62757			-
Metabolism.LipidMetabolism.Secondarybileacidbiosynthesis	2.56814			-
Metabolism.EnzymeFamilies	4.33508			-
Unclassified.CellularProcessesandSignaling.Cellmotilityandsecretion	3.29889			-
OrganismalSystems.DigestiveSystem.Pancreaticsecretion	0			-
Unclassified.CellularProcessesandSignaling.Inorganiciontransportandmetabolism	3.3062			-
Metabolism.XenobioticsBiodegradationandMetabolism.Benzoatedegradation	3.33864			-
EnvironmentalInformationProcessing.MembraneTransport.Bacterialsecretionsystem	3.78729			-
GeneticInformationProcessing.ReplicationandRepair.Homologousrecombination	3.97411			-
Metabolism.MetabolismofTerpenoidsandPolyketides.Prenyltransferases	3.48592			-
Metabolism.MetabolismofTerpenoidsandPolyketides.Terpenoidbackbonebiosynthesis	3.77317			-
CellularProcesses.CellGrowthandDeath.Cellcycle_yeast	0			-
GeneticInformationProcessing.Folding_SortingandDegradation.Proteasome	2.63296			-
OrganismalSystems.NervousSystem	3.03262			-
Unclassified.Metabolism.Lipidmetabolism	3.17498			-
GeneticInformationProcessing.ReplicationandRepair.Baseexcisionrepair	3.65434			-
CellularProcesses.CellCommunication.Adherensjunction	0			-
Metabolism.AminoAcidMetabolism.Lysinebiosynthesis	3.94269			-
Metabolism.AminoAcidMetabolism.Histidinemetabolism	3.80107			-
Unclassified.PoorlyCharacterized.Functionunknown	4.09735			-
Metabolism.EnergyMetabolism.Photosynthesis	3.60392			-
Metabolism.LipidMetabolism.Glycerophospholipidmetabolism	3.77548			-
HumanDiseases.ImmuneSystemDiseases.Systemiclupuserythematosus	1.52069			-
EnvironmentalInformationProcessing.SignalTransduction.Hedgehogsignalingpathway	0			-
Metabolism.XenobioticsBiodegradationandMetabolism.Caprolactamdegradation	2.4784			-
EnvironmentalInformationProcessing.SignalTransduction.MAPKsignalingpathway	0			-
Metabolism.BiosynthesisofOtherSecondaryMetabolites.Phenylpropanoidbiosynthesis	3.26227			-
OrganismalSystems.SensorySystem.Phototransduction_fly	0			-
GeneticInformationProcessing.Translation	4.76424			-
Metabolism.CarbohydrateMetabolism.C5_Brancheddibasicacidmetabolism	3.51149			-
Metabolism.BiosynthesisofOtherSecondaryMetabolites.beta_Lactamresistance	2.45307			-
CellularProcesses.CellCommunication.Tightjunction	0			-
HumanDiseases.InfectiousDiseases.Toxoplasmosis	0			-
Metabolism.MetabolismofCofactorsandVitamins.Lipoicacidmetabolism	2.43478			-
Metabolism.MetabolismofCofactorsandVitamins.Folatebiosynthesis	3.57181			-
Metabolism.LipidMetabolism.Primarybileacidbiosynthesis	2.57199			-
Metabolism.MetabolismofOtherAminoAcids	4.1529			-
Metabolism.AminoAcidMetabolism.Arginineandprolinemetabolism	4.10015			-
Metabolism.XenobioticsBiodegradationandMetabolism.Ethylbenzenedegradation	2.66122			-
OrganismalSystems.NervousSystem.Long_termpotentiation	0			-
Metabolism.AminoAcidMetabolism.Phenylalanine_tyrosineandtryptophanbiosynthesis	3.94792			-
OrganismalSystems.EndocrineSystem.GnRHsignalingpathway	0			-
Metabolism.MetabolismofTerpenoidsandPolyketides.BiosynthesisoftypeIIpolyketidebackbone	0			-
HumanDiseases.MetabolicDiseases.TypeIdiabetesmellitus	2.72273			-
HumanDiseases.NeurodegenerativeDiseases.Huntingtonsdisease	2.35081			-
Metabolism.CarbohydrateMetabolism.Fructoseandmannosemetabolism	4.02992			-
GeneticInformationProcessing.Transcription.RNApolymerase	3.24193			-
Metabolism.MetabolismofTerpenoidsandPolyketides.Polyketidesugarunitbiosynthesis	3.32132			-
GeneticInformationProcessing.Translation.Ribosomebiogenesisineukaryotes	2.67875			-
CellularProcesses.CellGrowthandDeath.Meiosis_yeast	1.85249			-
OrganismalSystems.DigestiveSystem.Salivarysecretion	0			-
Metabolism.CarbohydrateMetabolism	5.04547			-
GeneticInformationProcessing.Translation.RibosomeBiogenesis	4.16386			-
Metabolism.EnergyMetabolism.Photosynthesisproteins	3.60522			-
Metabolism.CarbohydrateMetabolism.Pentosephosphatepathway	3.98657			-
Metabolism.XenobioticsBiodegradationandMetabolism.Nitrotoluenedegradation	2.91828			-
Metabolism.XenobioticsBiodegradationandMetabolism	4.2044			-
GeneticInformationProcessing.ReplicationandRepair.Chromosome	4.2006			-
Metabolism.LipidMetabolism.Biosynthesisofunsaturatedfattyacids	3.14235			-
Metabolism.MetabolismofTerpenoidsandPolyketides.Geranioldegradation	2.56092			-
GeneticInformationProcessing.ReplicationandRepair.DNAreplicationproteins	4.09772			-
Unclassified.Metabolism.Carbohydratemetabolism	3.28516			-
CellularProcesses.CellGrowthandDeath.Oocytemeiosis	0			-
Metabolism.GlycanBiosynthesisandMetabolism.Otherglycandegradation	3.50044			-
Metabolism.LipidMetabolism.Fattyacidbiosynthesis	3.69671			-
Metabolism.AminoAcidMetabolism.Tryptophanmetabolism	3.10869			-
Metabolism.BiosynthesisofOtherSecondaryMetabolites.Novobiocinbiosynthesis	3.13223			-
Unclassified.CellularProcessesandSignaling.Signaltransductionmechanisms	3.7091			-
Metabolism.MetabolismofCofactorsandVitamins.Nicotinateandnicotinamidemetabolism	3.63524			-
OrganismalSystems.CirculatorySystem.Cardiacmusclecontraction	0			-
EnvironmentalInformationProcessing.SignalTransduction	4.17604			-
Metabolism.NucleotideMetabolism.Purinemetabolism	4.34917			-
Metabolism.LipidMetabolism.Fattyacidelongationinmitochondria	1.5206			-
GeneticInformationProcessing.Translation.Ribosome	4.37673			-
Metabolism.XenobioticsBiodegradationandMetabolism.Xylenedegradation	2.7285			-
Metabolism.CarbohydrateMetabolism.Pyruvatemetabolism	4.02422			-
EnvironmentalInformationProcessing.SignalingMoleculesandInteraction	3.21471			-
Metabolism.MetabolismofCofactorsandVitamins.Biotinmetabolism	3.19111			-
Metabolism.XenobioticsBiodegradationandMetabolism.Toluenedegradation	2.90457			-
Metabolism.XenobioticsBiodegradationandMetabolism.Atrazinedegradation	2.48513			-
Metabolism.MetabolismofCofactorsandVitamins.Retinolmetabolism	2.36794			-
Unclassified.Metabolism.Others	3.9582			-
Metabolism.AminoAcidMetabolism.Alanine_aspartateandglutamatemetabolism	4.03112			-
Metabolism.EnzymeFamilies.Proteinkinases	3.48324			-
Metabolism.CarbohydrateMetabolism.Starchandsucrosemetabolism	4.05379			-
Metabolism.CarbohydrateMetabolism.Ascorbateandaldaratemetabolism	3.08189			-
Unclassified.PoorlyCharacterized	4.68449			-
Metabolism.XenobioticsBiodegradationandMetabolism.Aminobenzoatedegradation	3.0486			-
HumanDiseases.NeurodegenerativeDiseases.Amyotrophiclateralsclerosis_ALS_	1.98296			0.0338949
Metabolism.BiosynthesisofOtherSecondaryMetabolites.Isoflavonoidbiosynthesis	0			-
Unclassified.CellularProcessesandSignaling.Membraneandintracellularstructuralmolecules	3.69448			-
Unclassified.GeneticInformationProcessing.Translationproteins	3.97548			-
HumanDiseases.InfectiousDiseases.Leishmaniasis	0			-
HumanDiseases.MetabolicDiseases.TypeIIdiabetesmellitus	2.71214			-
Metabolism.LipidMetabolism.Sphingolipidmetabolism	3.40787			-
Metabolism.CarbohydrateMetabolism.Inositolphosphatemetabolism	2.97501			-
EnvironmentalInformationProcessing.SignalTransduction.Wntsignalingpathway	0			-
OrganismalSystems.EndocrineSystem.Melanogenesis	0			-
Unclassified.GeneticInformationProcessing.Restrictionenzyme	3.31962			-
Unclassified.GeneticInformationProcessing.Proteinfoldingandassociatedprocessing	3.81341			-
GeneticInformationProcessing.ReplicationandRepair.Mismatchrepair	3.91682			-
OrganismalSystems.ImmuneSystem.Complementandcoagulationcascades	0			-
GeneticInformationProcessing.Translation.Translationfactors	3.73685			-
EnvironmentalInformationProcessing.SignalingMoleculesandInteraction.CAMligands	0			-
HumanDiseases.InfectiousDiseases.Chagasdisease_Americantrypanosomiasis_	1.6299			-
Metabolism.EnergyMetabolism.Nitrogenmetabolism	3.83626			-
HumanDiseases.ImmuneSystemDiseases.Rheumatoidarthritis	0			-
CellularProcesses.TransportandCatabolism.Phagosome	0			-
Metabolism.BiosynthesisofOtherSecondaryMetabolites.Caffeinemetabolism	1.52071			-
Metabolism.EnergyMetabolism.Oxidativephosphorylation	4.02861			-
Metabolism.GlycanBiosynthesisandMetabolism.N_Glycanbiosynthesis	2.36276			-
Metabolism.AminoAcidMetabolism	4.98655			-
Metabolism.LipidMetabolism.Arachidonicacidmetabolism	2.36354			-
Metabolism.MetabolismofOtherAminoAcids.beta_Alaninemetabolism	3.23006			-
Unclassified.CellularProcessesandSignaling.Electrontransfercarriers	2.40844			-
Metabolism.CarbohydrateMetabolism.Glycolysis_Gluconeogenesis	4.06704			-
Metabolism	5.67888			-
EnvironmentalInformationProcessing.SignalTransduction.VEGFsignalingpathway	0			-
Metabolism.XenobioticsBiodegradationandMetabolism.MetabolismofxenobioticsbycytochromeP450	2.33567			-
Metabolism.MetabolismofTerpenoidsandPolyketides.Limoneneandpinenedegradation	2.92502			-
HumanDiseases.CardiovascularDiseases.Hypertrophiccardiomyopathy_HCM_	0			-
OrganismalSystems.EnvironmentalAdaptation.Circadianrhythm_plant	1.52131			-
EnvironmentalInformationProcessing.SignalingMoleculesandInteraction.Cytokinereceptors	0			-
HumanDiseases.NeurodegenerativeDiseases.Alzheimersdisease	2.70249			-
EnvironmentalInformationProcessing.MembraneTransport	5.11645			-
Metabolism.GlycanBiosynthesisandMetabolism.Glycosyltransferases	3.52884			-
Metabolism.GlycanBiosynthesisandMetabolism.VarioustypesofN_glycanbiosynthesis	0			-
CellularProcesses.CellCommunication.Focaladhesion	0			-
Metabolism.MetabolismofTerpenoidsandPolyketides.Biosynthesisof12__14_and16_memberedmacrolides	0			-
EnvironmentalInformationProcessing.MembraneTransport.Transporters	4.85754			-
Metabolism.GlycanBiosynthesisandMetabolism.Lipopolysaccharidebiosynthesisproteins	3.51302			-
Metabolism.MetabolismofOtherAminoAcids.Taurineandhypotaurinemetabolism	3.01314			-
Metabolism.LipidMetabolism.Glycerolipidmetabolism	3.64479			-
GeneticInformationProcessing.Translation.Aminoacyl_tRNAbiosynthesis	4.0971			-
Metabolism.MetabolismofCofactorsandVitamins.Onecarbonpoolbyfolate	3.80188			-
Metabolism.MetabolismofCofactorsandVitamins	4.64179			-
GeneticInformationProcessing.Transcription.Spliceosome	0			-
CellularProcesses.CellMotility.Cytoskeletonproteins	3.61645			-
OrganismalSystems.CirculatorySystem.Vascularsmoothmusclecontraction	0			-
EnvironmentalInformationProcessing.MembraneTransport.Secretionsystem	4.06831			-
GeneticInformationProcessing.Folding_SortingandDegradation	4.38127			-
GeneticInformationProcessing.Transcription	4.47888			-
Metabolism.MetabolismofTerpenoidsandPolyketides.Biosynthesisofsiderophoregroupnonribosomalpeptides	2.30894			-
GeneticInformationProcessing.Transcription.Transcriptionmachinery	4.0243			-
GeneticInformationProcessing.ReplicationandRepair	4.95202			-
Metabolism.XenobioticsBiodegradationandMetabolism.Chloroalkaneandchloroalkenedegradation	3.27184			-
EnvironmentalInformationProcessing.SignalTransduction.mTORsignalingpathway	0			-
OrganismalSystems.DigestiveSystem.Bilesecretion	0.226533			-
Metabolism.EnergyMetabolism.Photosynthesis_antennaproteins	0.284115			-
OrganismalSystems.EndocrineSystem.Progesterone_mediatedoocytematuration	2.62757			-
Metabolism.BiosynthesisofOtherSecondaryMetabolites.Clavulanicacidbiosynthesis	0			-
Unclassified.CellularProcessesandSignaling.Germination	2.63615			-
Metabolism.LipidMetabolism.Steroidhormonebiosynthesis	2.42439			-
HumanDiseases.NeurodegenerativeDiseases.Parkinsonsdisease	0.251037			-
HumanDiseases.Cancers.Smallcelllungcancer	0			-
Metabolism.MetabolismofOtherAminoAcids.D_Alaninemetabolism	3.02213			-
Unclassified.Metabolism.Aminoacidmetabolism	3.29073			-
OrganismalSystems.ExcretorySystem.Vasopressin_regulatedwaterreabsorption	0			-
OrganismalSystems.DigestiveSystem.Mineralabsorption	1.81081			-
Metabolism.BiosynthesisofOtherSecondaryMetabolites.Streptomycinbiosynthesis	3.5237			-
GeneticInformationProcessing.Folding_SortingandDegradation.Chaperonesandfoldingcatalysts	3.9962			-
OrganismalSystems.ImmuneSystem.FcepsilonRIsignalingpathway	0			-
OrganismalSystems.NervousSystem.Neurotrophinsignalingpathway	0			-
Unclassified.CellularProcessesandSignaling.Poresionchannels	3.50423			-
Metabolism.CarbohydrateMetabolism.Citratecycle_TCAcycle_	3.76002			-
OrganismalSystems.ExcretorySystem.Aldosterone_regulatedsodiumreabsorption	0			-
Metabolism.XenobioticsBiodegradationandMetabolism.Drugmetabolism_cytochromeP450	2.40071			-
EnvironmentalInformationProcessing.MembraneTransport.Phosphotransferasesystem_PTS_	3.71954			-
HumanDiseases.InfectiousDiseases.Staphylococcusaureusinfection	1.66385			-
HumanDiseases.MetabolicDiseases	3.0185			-
Metabolism.LipidMetabolism	4.46812			-
EnvironmentalInformationProcessing.SignalTransduction.Two_componentsystem	4.13857			-
GeneticInformationProcessing.Folding_SortingandDegradation.RNAdegradation	3.67356			-
Metabolism.XenobioticsBiodegradationandMetabolism.Chlorocyclohexaneandchlorobenzenedegradation	2.14234			-
GeneticInformationProcessing.Folding_SortingandDegradation.Ubiquitinsystem	1.79478			-
EnvironmentalInformationProcessing.SignalingMoleculesandInteraction.GTP_bindingproteins	0			-
CellularProcesses.CellMotility	4.26936			-
HumanDiseases.CardiovascularDiseases.Viralmyocarditis	0			-
Metabolism.BiosynthesisofOtherSecondaryMetabolites.Tropane_piperidineandpyridinealkaloidbiosynthesis	3.08039			-
Metabolism.GlycanBiosynthesisandMetabolism.Lipopolysaccharidebiosynthesis	3.36643			-
Metabolism.XenobioticsBiodegradationandMetabolism.Fluorobenzoatedegradation	1.84721			-
OrganismalSystems.NervousSystem.Long_termdepression	0			-
EnvironmentalInformationProcessing.SignalTransduction.TGF_betasignalingpathway	0			-
Metabolism.MetabolismofTerpenoidsandPolyketides.BiosynthesisoftypeIIpolyketideproducts	0			-
Metabolism.AminoAcidMetabolism.Glycine_serineandthreoninemetabolism	3.91177			-
OrganismalSystems.SensorySystem	0			-
Metabolism.AminoAcidMetabolism.Valine_leucineandisoleucinebiosynthesis	3.88197			-
OrganismalSystems.ImmuneSystem.FcgammaR_mediatedphagocytosis	0			-
GeneticInformationProcessing.Translation.RNAtransport	3.1752			-
Metabolism.CarbohydrateMetabolism.Galactosemetabolism	3.9254			-
Metabolism.GlycanBiosynthesisandMetabolism.Glycosylphosphatidylinositol_GPI__anchorbiosynthesis	0			-
OrganismalSystems.DigestiveSystem.Carbohydratedigestionandabsorption	2.21566			-
OrganismalSystems.NervousSystem.Cholinergicsynapse	0			-
Metabolism.BiosynthesisofOtherSecondaryMetabolites.Butirosinandneomycinbiosynthesis	2.94688			-
EnvironmentalInformationProcessing.SignalingMoleculesandInteraction.ECM_receptorinteraction	0			-
CellularProcesses.CellMotility.Bacterialchemotaxis	3.59697			-
OrganismalSystems.ImmuneSystem.RIG_I_likereceptorsignalingpathway	1.4624			-
HumanDiseases.ImmuneSystemDiseases	2.63067			-
HumanDiseases.InfectiousDiseases.PathogenicEscherichiacoliinfection	1.09326			-
CellularProcesses.CellMotility.Bacterialmotilityproteins	3.89353			-
Metabolism.MetabolismofTerpenoidsandPolyketides.Carotenoidbiosynthesis	1.8965			-
Metabolism.BiosynthesisofOtherSecondaryMetabolites.Indolealkaloidbiosynthesis	0			-
OrganismalSystems.DigestiveSystem.Fatdigestionandabsorption	0			-
Metabolism.AminoAcidMetabolism.Aminoacidrelatedenzymes	4.17961			-
HumanDiseases.InfectiousDiseases.Africantrypanosomiasis	1.6879			-
GeneticInformationProcessing.ReplicationandRepair.Non_homologousend_joining	2.27562			-
GeneticInformationProcessing.ReplicationandRepair.DNArepairandrecombinationproteins	4.45837			-
Metabolism.BiosynthesisofOtherSecondaryMetabolites.Betalainbiosynthesis	0			-
HumanDiseases.InfectiousDiseases.Measles	0			-
HumanDiseases.InfectiousDiseases.HepatitisC	0			-
Metabolism.MetabolismofTerpenoidsandPolyketides.Sesquiterpenoidbiosynthesis	0			-
Metabolism.BiosynthesisofOtherSecondaryMetabolites.Isoquinolinealkaloidbiosynthesis	2.73137			-
CellularProcesses.CellCommunication	0			-
CellularProcesses.CellMotility.Regulationofactincytoskeleton	0			-
HumanDiseases.InfectiousDiseases.Tuberculosis	3.20186			-
GeneticInformationProcessing.Folding_SortingandDegradation.Sulfurrelaysystem	3.43025			-
Metabolism.MetabolismofTerpenoidsandPolyketides	4.21427			-
GeneticInformationProcessing.ReplicationandRepair.DNAreplication	3.81782			-
OrganismalSystems.EndocrineSystem	3.50338			-
Metabolism.GlycanBiosynthesisandMetabolism.Glycosaminoglycanbiosynthesis_chondroitinsulfate	0			-
OrganismalSystems.ImmuneSystem.Leukocytetransendothelialmigration	0			-
GeneticInformationProcessing.Transcription.Transcriptionfactors	4.25253			-
Metabolism.EnergyMetabolism.Carbonfixationinphotosyntheticorganisms	3.84122			-
Metabolism.MetabolismofCofactorsandVitamins.Riboflavinmetabolism	3.35128			-
Metabolism.NucleotideMetabolism	4.60862			-
OrganismalSystems.ExcretorySystem.Proximaltubulebicarbonatereclamation	2.41983			-
EnvironmentalInformationProcessing.SignalTransduction.Notchsignalingpathway	0			-
GeneticInformationProcessing	5.30286			-
Metabolism.XenobioticsBiodegradationandMetabolism.Polycyclicaromatichydrocarbondegradation	3.06341			-
HumanDiseases.InfectiousDiseases	3.56366			-
GeneticInformationProcessing.Translation.mRNAsurveillancepathway	0			-
Metabolism.MetabolismofOtherAminoAcids.Phosphonateandphosphinatemetabolism	2.77594			-
Unclassified	5.15232			-
Metabolism.XenobioticsBiodegradationandMetabolism.Dioxindegradation	2.74255			-
Metabolism.EnergyMetabolism.Methanemetabolism	4.10268			-
Metabolism.BiosynthesisofOtherSecondaryMetabolites	3.99162			-
Unclassified.CellularProcessesandSignaling.Otherion_coupledtransporters	4.11664			-
HumanDiseases.Cancers.Colorectalcancer	0			-
OrganismalSystems.ExcretorySystem	2.41983			-
Metabolism.MetabolismofTerpenoidsandPolyketides.Zeatinbiosynthesis	2.73355			-
HumanDiseases.CardiovascularDiseases	0			-
EnvironmentalInformationProcessing.MembraneTransport.ABCtransporters	4.552			-
EnvironmentalInformationProcessing	5.16847			-
Metabolism.EnergyMetabolism	4.75975			-
Metabolism.XenobioticsBiodegradationandMetabolism.1_1_1_Trichloro_2_2_bis_4_chlorophenyl_ethane_DDT_degradation	0.0645065			-
HumanDiseases.InfectiousDiseases.Vibriocholeraeinfection	0			-
Metabolism.AminoAcidMetabolism.Tyrosinemetabolism	3.50671			-
HumanDiseases.NeurodegenerativeDiseases	2.92217			-
Unclassified.Metabolism.Biosynthesisandbiodegradationofsecondarymetabolites	2.86752			-
EnvironmentalInformationProcessing.SignalTransduction.MAPKsignalingpathway_yeast	2.62103			-
Metabolism.MetabolismofCofactorsandVitamins.VitaminB6metabolism	3.31537			0.0338949
CellularProcesses.CellGrowthandDeath.Apoptosis	0.471257			-
OrganismalSystems.NervousSystem.Glutamatergicsynapse	3.03262			-
Metabolism.AminoAcidMetabolism.Cysteineandmethioninemetabolism	3.98942			-
OrganismalSystems.ImmuneSystem.CytosolicDNA_sensingpathway	0			-
Metabolism.XenobioticsBiodegradationandMetabolism.Naphthalenedegradation	3.12518			-
OrganismalSystems.SensorySystem.Olfactorytransduction	0			-
HumanDiseases.InfectiousDiseases.Pertussis	2.34277			-
CellularProcesses.TransportandCatabolism	3.4752			-
Metabolism.XenobioticsBiodegradationandMetabolism.Styrenedegradation	2.31358			-
Metabolism.EnergyMetabolism.Sulfurmetabolism	3.44963			-
Unclassified.GeneticInformationProcessing	4.41685			-
OrganismalSystems.EndocrineSystem.Renin_angiotensinsystem	0			-
EnvironmentalInformationProcessing.SignalTransduction.ErbBsignalingpathway	0			-
OrganismalSystems.ImmuneSystem	2.94585			-
OrganismalSystems.ExcretorySystem.Endocrineandotherfactor_regulatedcalciumreabsorption	0			-
Metabolism.NucleotideMetabolism.Pyrimidinemetabolism	4.27227			-

## Sheet: MotherSecretorStatus_EBF
KEGG Functional Group	log Class Average	Class	LDA Effect Size	p
CellularProcesses.TransportandCatabolism.Peroxisome	3.20934	N	2.01435	0.0412268
Metabolism.GlycanBiosynthesisandMetabolism.Glycosphingolipidbiosynthesis_globoseries	3.04789	N	2.11482	0.0412268
Metabolism.MetabolismofCofactorsandVitamins.VitaminB6metabolism	3.31346	N	2.15318	0.0247447
OrganismalSystems.DigestiveSystem	2.62015	N	2.1932	0.0143059
OrganismalSystems.DigestiveSystem.Mineralabsorption	1.88225	N	2.20951	0.0143059
Unclassified.Metabolism.Energymetabolism	3.97053	N	2.81035	0.0143059
Unclassified.PoorlyCharacterized.Generalfunctionpredictiononly	4.55881	N	2.82611	0.0143059
Metabolism.EnzymeFamilies.Peptidases	4.27959	N	2.84294	0.0247447
GeneticInformationProcessing.ReplicationandRepair.DNAreplicationproteins	4.11242	N	2.92031	0.0412268
CellularProcesses.CellGrowthandDeath.Cellcycle	0			-
GeneticInformationProcessing.Transcription.Basaltranscriptionfactors	0.992059			-
HumanDiseases.Cancers.Renalcellcarcinoma	2.06989			-
OrganismalSystems.ImmuneSystem.Hematopoieticcelllineage	0			-
EnvironmentalInformationProcessing.SignalTransduction.Phosphatidylinositolsignalingsystem	2.91617			-
Metabolism.AminoAcidMetabolism.Lysinedegradation	3.13787			-
HumanDiseases.InfectiousDiseases.Bacterialinvasionofepithelialcells	0.657073			-
Metabolism.MetabolismofTerpenoidsandPolyketides.Tetracyclinebiosynthesis	3.17931			-
Unclassified.GeneticInformationProcessing.Replication_recombinationandrepairproteins	3.91773			-
Metabolism.MetabolismofOtherAminoAcids.Selenocompoundmetabolism	3.55593			-
CellularProcesses.CellGrowthandDeath.p53signalingpathway	0			-
HumanDiseases.ImmuneSystemDiseases.Primaryimmunodeficiency	2.59511			-
HumanDiseases.InfectiousDiseases.Shigellosis	0			-
HumanDiseases.Cancers.Bladdercancer	0.634116			-
GeneticInformationProcessing.Folding_SortingandDegradation.Proteinprocessinginendoplasmicreticulum	2.82464			-
HumanDiseases	3.83135			-
GeneticInformationProcessing.Folding_SortingandDegradation.Proteinexport	3.78105			-
Metabolism.MetabolismofOtherAminoAcids.D_GlutamineandD_glutamatemetabolism	3.17501			-
EnvironmentalInformationProcessing.SignalTransduction.Calciumsignalingpathway	0			-
HumanDiseases.InfectiousDiseases.Vibriocholeraepathogeniccycle	2.87823			0.0412268
Metabolism.MetabolismofOtherAminoAcids.Glutathionemetabolism	3.24293			-
OrganismalSystems.EnvironmentalAdaptation	3.23809			-
Metabolism.EnzymeFamilies.CytochromeP450	0			-
Metabolism.BiosynthesisofOtherSecondaryMetabolites.Penicillinandcephalosporinbiosynthesis	2.33082			-
OrganismalSystems.CirculatorySystem	0			-
HumanDiseases.InfectiousDiseases.InfluenzaA	0			-
OrganismalSystems	3.87176			-
HumanDiseases.CardiovascularDiseases.Dilatedcardiomyopathy_DCM_	0			-
Metabolism.LipidMetabolism.Linoleicacidmetabolism	2.8607			-
Metabolism.EnergyMetabolism.Carbonfixationpathwaysinprokaryotes	3.9824			-
Metabolism.CarbohydrateMetabolism.Glyoxylateanddicarboxylatemetabolism	3.7163			-
EnvironmentalInformationProcessing.SignalingMoleculesandInteraction.Neuroactiveligand_receptorinteraction	0			-
Unclassified.Metabolism.Nucleotidemetabolism	2.70352			-
Metabolism.MetabolismofOtherAminoAcids.D_ArginineandD_ornithinemetabolism	1.87232			-
CellularProcesses.CellGrowthandDeath	3.71201			-
CellularProcesses	4.45948			-
Metabolism.GlycanBiosynthesisandMetabolism.Glycosphingolipidbiosynthesis_ganglioseries	2.6293			-
Unclassified.CellularProcessesandSignaling.Sporulation	3.95929			-
OrganismalSystems.EnvironmentalAdaptation.Plant_pathogeninteraction	3.22832			-
Metabolism.AminoAcidMetabolism.Phenylalaninemetabolism	3.25393			-
EnvironmentalInformationProcessing.SignalingMoleculesandInteraction.Glycanbindngproteins	0			-
Metabolism.BiosynthesisofOtherSecondaryMetabolites.Stilbenoid_diarylheptanoidandgingerolbiosynthesis	0.835454			-
CellularProcesses.TransportandCatabolism.Lysosome	3.00592			-
Metabolism.GlycanBiosynthesisandMetabolism.Glycosaminoglycandegradation	2.80055			-
OrganismalSystems.DigestiveSystem.Gastricacidsecretion	0			-
GeneticInformationProcessing.ReplicationandRepair.Nucleotideexcisionrepair	3.60555			-
Metabolism.GlycanBiosynthesisandMetabolism.Peptidoglycanbiosynthesis	3.93057			-
Metabolism.MetabolismofCofactorsandVitamins.Ubiquinoneandotherterpenoid_quinonebiosynthesis	3.10118			-
CellularProcesses.CellGrowthandDeath.Cellcycle_Caulobacter	3.71014			-
HumanDiseases.CardiovascularDiseases.Arrhythmogenicrightventricularcardiomyopathy_ARVC_	0			-
CellularProcesses.CellMotility.Flagellarassembly	3.54407			-
Metabolism.MetabolismofCofactorsandVitamins.Thiaminemetabolism	3.72347			-
Metabolism.MetabolismofCofactorsandVitamins.Porphyrinandchlorophyllmetabolism	4.03924			-
HumanDiseases.Cancers.Pathwaysincancer	2.68967			-
Metabolism.LipidMetabolism.Etherlipidmetabolism	1.29951			-
Unclassified.Metabolism.Metabolismofcofactorsandvitamins	3.06439			-
CellularProcesses.TransportandCatabolism.Endocytosis	0			-
HumanDiseases.Cancers.Pancreaticcancer	0			-
Unclassified.GeneticInformationProcessing.Transcriptionrelatedproteins	2.13641			-
Metabolism.LipidMetabolism.alpha_Linolenicacidmetabolism	1.19448			-
EnvironmentalInformationProcessing.SignalingMoleculesandInteraction.Ionchannels	2.13251			-
Metabolism.MetabolismofCofactorsandVitamins.PantothenateandCoAbiosynthesis	3.80851			-
Metabolism.GlycanBiosynthesisandMetabolism	4.3416			-
Metabolism.MetabolismofTerpenoidsandPolyketides.Biosynthesisofansamycins	3.1445			-
HumanDiseases.Cancers	2.99479			-
Metabolism.GlycanBiosynthesisandMetabolism.OthertypesofO_glycanbiosynthesis	0			-
HumanDiseases.InfectiousDiseases.EpithelialcellsignalinginHelicobacterpyloriinfection	2.98029			-
Metabolism.CarbohydrateMetabolism.Propanoatemetabolism	3.70399			-
HumanDiseases.InfectiousDiseases.Amoebiasis	1.93733			-
Unclassified.CellularProcessesandSignaling	4.6245			-
Metabolism.XenobioticsBiodegradationandMetabolism.Bisphenoldegradation	2.94017			-
Metabolism.LipidMetabolism.Fattyacidmetabolism	3.34544			-
Unclassified.CellularProcessesandSignaling.Celldivision	2.81742			-
Metabolism.LipidMetabolism.Steroidbiosynthesis	2.06205			-
Metabolism.LipidMetabolism.Synthesisanddegradationofketonebodies	2.51412			-
HumanDiseases.Cancers.Chronicmyeloidleukemia	0			-
Metabolism.LipidMetabolism.Lipidbiosynthesisproteins	3.78528			-
OrganismalSystems.EndocrineSystem.Insulinsignalingpathway	2.98469			-
OrganismalSystems.SensorySystem.Phototransduction	0			-
Metabolism.GlycanBiosynthesisandMetabolism.Glycosphingolipidbiosynthesis_lactoandneolactoseries	0.298003			-
Metabolism.BiosynthesisofOtherSecondaryMetabolites.Flavonoidbiosynthesis	1.98508			-
HumanDiseases.NeurodegenerativeDiseases.Priondiseases	1.6156			-
OrganismalSystems.EndocrineSystem.PPARsignalingpathway	3.04761			-
EnvironmentalInformationProcessing.SignalingMoleculesandInteraction.Gprotein_coupledreceptors	0			-
EnvironmentalInformationProcessing.SignalingMoleculesandInteraction.Cytokine_cytokinereceptorinteraction	0			-
Metabolism.CarbohydrateMetabolism.Aminosugarandnucleotidesugarmetabolism	4.16759			-
OrganismalSystems.ImmuneSystem.NOD_likereceptorsignalingpathway	2.64763			-
Metabolism.AminoAcidMetabolism.Valine_leucineandisoleucinedegradation	3.32641			-
HumanDiseases.Cancers.Glioma	0			-
Metabolism.CarbohydrateMetabolism.Butanoatemetabolism	3.79405			-
OrganismalSystems.ImmuneSystem.Antigenprocessingandpresentation	2.64539			0.0412268
Metabolism.LipidMetabolism.Secondarybileacidbiosynthesis	2.55925			-
Metabolism.EnzymeFamilies	4.34159			-
Unclassified.CellularProcessesandSignaling.Cellmotilityandsecretion	3.32022			-
OrganismalSystems.DigestiveSystem.Pancreaticsecretion	0			-
Unclassified.CellularProcessesandSignaling.Inorganiciontransportandmetabolism	3.31887			-
Metabolism.XenobioticsBiodegradationandMetabolism.Benzoatedegradation	3.35422			-
EnvironmentalInformationProcessing.MembraneTransport.Bacterialsecretionsystem	3.79687			-
GeneticInformationProcessing.ReplicationandRepair.Homologousrecombination	3.98326			-
Metabolism.MetabolismofTerpenoidsandPolyketides.Prenyltransferases	3.49172			-
Metabolism.MetabolismofTerpenoidsandPolyketides.Terpenoidbackbonebiosynthesis	3.77465			-
CellularProcesses.CellGrowthandDeath.Cellcycle_yeast	0			-
GeneticInformationProcessing.Folding_SortingandDegradation.Proteasome	2.6496			0.0412268
OrganismalSystems.NervousSystem	3.03144			-
Unclassified.Metabolism.Lipidmetabolism	3.17556			-
GeneticInformationProcessing.ReplicationandRepair.Baseexcisionrepair	3.65604			-
CellularProcesses.CellCommunication.Adherensjunction	0			-
Metabolism.AminoAcidMetabolism.Lysinebiosynthesis	3.94104			-
Metabolism.AminoAcidMetabolism.Histidinemetabolism	3.79991			-
Unclassified.PoorlyCharacterized.Functionunknown	4.10287			-
Metabolism.EnergyMetabolism.Photosynthesis	3.59798			-
Metabolism.LipidMetabolism.Glycerophospholipidmetabolism	3.78083			-
HumanDiseases.ImmuneSystemDiseases.Systemiclupuserythematosus	1.58461			-
EnvironmentalInformationProcessing.SignalTransduction.Hedgehogsignalingpathway	0			-
Metabolism.XenobioticsBiodegradationandMetabolism.Caprolactamdegradation	2.51748			-
EnvironmentalInformationProcessing.SignalTransduction.MAPKsignalingpathway	0			-
Metabolism.BiosynthesisofOtherSecondaryMetabolites.Phenylpropanoidbiosynthesis	3.24114			-
OrganismalSystems.SensorySystem.Phototransduction_fly	0			-
GeneticInformationProcessing.Translation	4.76668			-
Metabolism.CarbohydrateMetabolism.C5_Brancheddibasicacidmetabolism	3.50878			-
Metabolism.BiosynthesisofOtherSecondaryMetabolites.beta_Lactamresistance	2.43663			-
CellularProcesses.CellCommunication.Tightjunction	0			-
HumanDiseases.InfectiousDiseases.Toxoplasmosis	0			-
Metabolism.MetabolismofCofactorsandVitamins.Lipoicacidmetabolism	2.36725			-
Metabolism.MetabolismofCofactorsandVitamins.Folatebiosynthesis	3.5669			-
Metabolism.LipidMetabolism.Primarybileacidbiosynthesis	2.56118			-
Metabolism.MetabolismofOtherAminoAcids	4.14421			-
Metabolism.AminoAcidMetabolism.Arginineandprolinemetabolism	4.09705			-
Metabolism.XenobioticsBiodegradationandMetabolism.Ethylbenzenedegradation	2.70515			-
EnvironmentalInformationProcessing.SignalingMoleculesandInteraction.Bacterialtoxins	3.11116			-
OrganismalSystems.NervousSystem.Long_termpotentiation	0			-
Metabolism.AminoAcidMetabolism.Phenylalanine_tyrosineandtryptophanbiosynthesis	3.94989			-
OrganismalSystems.EndocrineSystem.GnRHsignalingpathway	0			-
Metabolism.MetabolismofTerpenoidsandPolyketides.BiosynthesisoftypeIIpolyketidebackbone	0			-
HumanDiseases.MetabolicDiseases.TypeIdiabetesmellitus	2.71557			-
HumanDiseases.NeurodegenerativeDiseases.Huntingtonsdisease	2.35984			-
Metabolism.CarbohydrateMetabolism.Fructoseandmannosemetabolism	4.0096			-
GeneticInformationProcessing.Transcription.RNApolymerase	3.24466			-
Metabolism.MetabolismofTerpenoidsandPolyketides.Polyketidesugarunitbiosynthesis	3.31745			-
GeneticInformationProcessing.Translation.Ribosomebiogenesisineukaryotes	2.67907			-
CellularProcesses.CellGrowthandDeath.Meiosis_yeast	1.91484			-
OrganismalSystems.DigestiveSystem.Salivarysecretion	0			-
Metabolism.CarbohydrateMetabolism	5.03766			-
GeneticInformationProcessing.Translation.RibosomeBiogenesis	4.16706			-
Metabolism.EnergyMetabolism.Photosynthesisproteins	3.59916			-
Metabolism.CarbohydrateMetabolism.Pentosephosphatepathway	3.98864			-
Metabolism.XenobioticsBiodegradationandMetabolism.Nitrotoluenedegradation	2.90845			-
Metabolism.XenobioticsBiodegradationandMetabolism	4.2117			-
GeneticInformationProcessing.ReplicationandRepair.Chromosome	4.2077			-
Metabolism.LipidMetabolism.Biosynthesisofunsaturatedfattyacids	3.16109			-
Metabolism.MetabolismofTerpenoidsandPolyketides.Geranioldegradation	2.54956			-
Unclassified.Metabolism.Carbohydratemetabolism	3.28457			-
CellularProcesses.CellGrowthandDeath.Oocytemeiosis	0			-
Metabolism.GlycanBiosynthesisandMetabolism.Otherglycandegradation	3.44288			-
Metabolism.LipidMetabolism.Fattyacidbiosynthesis	3.69487			-
Metabolism.AminoAcidMetabolism.Tryptophanmetabolism	3.11856			-
Metabolism.BiosynthesisofOtherSecondaryMetabolites.Novobiocinbiosynthesis	3.1277			-
Unclassified.CellularProcessesandSignaling.Signaltransductionmechanisms	3.71364			-
Metabolism.MetabolismofCofactorsandVitamins.Nicotinateandnicotinamidemetabolism	3.63684			-
EnvironmentalInformationProcessing.SignalingMoleculesandInteraction.Cellularantigens	2.4597			-
OrganismalSystems.CirculatorySystem.Cardiacmusclecontraction	0			-
EnvironmentalInformationProcessing.SignalTransduction	4.18507			-
Metabolism.NucleotideMetabolism.Purinemetabolism	4.3503			-
Metabolism.LipidMetabolism.Fattyacidelongationinmitochondria	1.58455			-
GeneticInformationProcessing.Translation.Ribosome	4.3885			-
Metabolism.XenobioticsBiodegradationandMetabolism.Xylenedegradation	2.74797			-
Metabolism.CarbohydrateMetabolism.Pyruvatemetabolism	4.02147			-
EnvironmentalInformationProcessing.SignalingMoleculesandInteraction	3.20839			-
Metabolism.MetabolismofCofactorsandVitamins.Biotinmetabolism	3.19315			-
Metabolism.XenobioticsBiodegradationandMetabolism.Toluenedegradation	2.88967			-
Metabolism.XenobioticsBiodegradationandMetabolism.Atrazinedegradation	2.51406			-
Metabolism.MetabolismofCofactorsandVitamins.Retinolmetabolism	2.40724			-
Unclassified.Metabolism.Others	3.96255			-
Metabolism.AminoAcidMetabolism.Alanine_aspartateandglutamatemetabolism	4.02998			-
Metabolism.EnzymeFamilies.Proteinkinases	3.48873			-
Metabolism.CarbohydrateMetabolism.Starchandsucrosemetabolism	4.05224			-
Metabolism.CarbohydrateMetabolism.Ascorbateandaldaratemetabolism	3.05783			-
Unclassified.PoorlyCharacterized	4.68147			-
Metabolism.XenobioticsBiodegradationandMetabolism.Aminobenzoatedegradation	3.05149			-
HumanDiseases.Cancers.Prostatecancer	2.65798			-
HumanDiseases.NeurodegenerativeDiseases.Amyotrophiclateralsclerosis_ALS_	1.86813			-
Metabolism.BiosynthesisofOtherSecondaryMetabolites.Isoflavonoidbiosynthesis	0			-
Metabolism.CarbohydrateMetabolism.Pentoseandglucuronateinterconversions	3.78616			-
Unclassified.CellularProcessesandSignaling.Membraneandintracellularstructuralmolecules	3.64976			-
Unclassified.GeneticInformationProcessing.Translationproteins	3.97913			-
HumanDiseases.InfectiousDiseases.Leishmaniasis	0			-
HumanDiseases.MetabolicDiseases.TypeIIdiabetesmellitus	2.72161			-
Metabolism.LipidMetabolism.Sphingolipidmetabolism	3.3619			-
Unclassified.CellularProcessesandSignaling.Othertransporters	3.44608			0.0412268
Metabolism.BiosynthesisofOtherSecondaryMetabolites.Flavoneandflavonolbiosynthesis	1.8578			0.0143059
Metabolism.CarbohydrateMetabolism.Inositolphosphatemetabolism	2.96666			-
EnvironmentalInformationProcessing.SignalTransduction.Wntsignalingpathway	0			-
OrganismalSystems.EndocrineSystem.Melanogenesis	0			-
Unclassified.GeneticInformationProcessing.Restrictionenzyme	3.31981			-
Unclassified.GeneticInformationProcessing.Proteinfoldingandassociatedprocessing	3.8157			-
GeneticInformationProcessing.ReplicationandRepair.Mismatchrepair	3.92202			-
OrganismalSystems.ImmuneSystem.Complementandcoagulationcascades	0			-
GeneticInformationProcessing.Translation.Translationfactors	3.7423			-
EnvironmentalInformationProcessing.SignalingMoleculesandInteraction.CAMligands	0			-
HumanDiseases.InfectiousDiseases.Chagasdisease_Americantrypanosomiasis_	1.69155			-
Metabolism.EnergyMetabolism.Nitrogenmetabolism	3.82814			-
HumanDiseases.ImmuneSystemDiseases.Rheumatoidarthritis	0			-
CellularProcesses.TransportandCatabolism.Phagosome	0			-
Metabolism.BiosynthesisofOtherSecondaryMetabolites.Caffeinemetabolism	1.58462			-
Metabolism.EnergyMetabolism.Oxidativephosphorylation	4.01775			-
Metabolism.GlycanBiosynthesisandMetabolism.N_Glycanbiosynthesis	2.36333			-
Metabolism.AminoAcidMetabolism	4.98559			-
Metabolism.LipidMetabolism.Arachidonicacidmetabolism	2.39139			-
Metabolism.MetabolismofOtherAminoAcids.beta_Alaninemetabolism	3.21521			-
Unclassified.CellularProcessesandSignaling.Electrontransfercarriers	2.41494			-
Metabolism.CarbohydrateMetabolism.Glycolysis_Gluconeogenesis	4.06443			-
Metabolism	5.6745			-
EnvironmentalInformationProcessing.SignalTransduction.VEGFsignalingpathway	0			-
Unclassified.Metabolism	4.40873			-
Metabolism.XenobioticsBiodegradationandMetabolism.MetabolismofxenobioticsbycytochromeP450	2.3729			-
Metabolism.MetabolismofTerpenoidsandPolyketides.Limoneneandpinenedegradation	2.92884			-
HumanDiseases.CardiovascularDiseases.Hypertrophiccardiomyopathy_HCM_	0			-
OrganismalSystems.EnvironmentalAdaptation.Circadianrhythm_plant	1.58518			-
EnvironmentalInformationProcessing.SignalingMoleculesandInteraction.Cytokinereceptors	0			-
HumanDiseases.NeurodegenerativeDiseases.Alzheimersdisease	2.70681			-
EnvironmentalInformationProcessing.MembraneTransport	5.11785			-
Metabolism.GlycanBiosynthesisandMetabolism.Glycosyltransferases	3.53852			-
Metabolism.GlycanBiosynthesisandMetabolism.VarioustypesofN_glycanbiosynthesis	0			-
CellularProcesses.CellCommunication.Focaladhesion	0			-
Metabolism.MetabolismofTerpenoidsandPolyketides.Biosynthesisof12__14_and16_memberedmacrolides	0			-
EnvironmentalInformationProcessing.MembraneTransport.Transporters	4.85825			-
Metabolism.GlycanBiosynthesisandMetabolism.Lipopolysaccharidebiosynthesisproteins	3.53061			-
Metabolism.MetabolismofOtherAminoAcids.Taurineandhypotaurinemetabolism	3.00711			-
Metabolism.LipidMetabolism.Glycerolipidmetabolism	3.65121			-
GeneticInformationProcessing.Translation.Aminoacyl_tRNAbiosynthesis	4.09674			-
Metabolism.MetabolismofCofactorsandVitamins.Onecarbonpoolbyfolate	3.81164			-
Metabolism.MetabolismofCofactorsandVitamins	4.64195			-
GeneticInformationProcessing.Transcription.Spliceosome	0			-
CellularProcesses.CellMotility.Cytoskeletonproteins	3.63595			-
OrganismalSystems.CirculatorySystem.Vascularsmoothmusclecontraction	0			-
EnvironmentalInformationProcessing.MembraneTransport.Secretionsystem	4.07863			-
GeneticInformationProcessing.Folding_SortingandDegradation	4.38312			-
GeneticInformationProcessing.Transcription	4.48294			-
Metabolism.MetabolismofTerpenoidsandPolyketides.Biosynthesisofsiderophoregroupnonribosomalpeptides	2.27079			-
GeneticInformationProcessing.Transcription.Transcriptionmachinery	4.02244			-
GeneticInformationProcessing.ReplicationandRepair	4.9615			-
Metabolism.XenobioticsBiodegradationandMetabolism.Chloroalkaneandchloroalkenedegradation	3.26357			-
EnvironmentalInformationProcessing.SignalTransduction.mTORsignalingpathway	0			-
OrganismalSystems.DigestiveSystem.Bilesecretion	0.217314			-
Metabolism.EnergyMetabolism.Photosynthesis_antennaproteins	0.409054			-
OrganismalSystems.EndocrineSystem.Progesterone_mediatedoocytematuration	2.64539			0.0412268
Metabolism.BiosynthesisofOtherSecondaryMetabolites.Clavulanicacidbiosynthesis	0			-
Unclassified.CellularProcessesandSignaling.Germination	2.67408			-
Metabolism.LipidMetabolism.Steroidhormonebiosynthesis	2.38441			-
HumanDiseases.NeurodegenerativeDiseases.Parkinsonsdisease	0.327519			-
HumanDiseases.Cancers.Smallcelllungcancer	0			-
Metabolism.MetabolismofOtherAminoAcids.D_Alaninemetabolism	3.03062			-
Unclassified.Metabolism.Aminoacidmetabolism	3.27167			-
OrganismalSystems.ExcretorySystem.Vasopressin_regulatedwaterreabsorption	0			-
Metabolism.BiosynthesisofOtherSecondaryMetabolites.Streptomycinbiosynthesis	3.51969			-
GeneticInformationProcessing.Folding_SortingandDegradation.Chaperonesandfoldingcatalysts	3.99614			-
OrganismalSystems.ImmuneSystem.FcepsilonRIsignalingpathway	0			-
OrganismalSystems.NervousSystem.Neurotrophinsignalingpathway	0			-
Unclassified.CellularProcessesandSignaling.Poresionchannels	3.47264			-
Metabolism.CarbohydrateMetabolism.Citratecycle_TCAcycle_	3.74985			-
OrganismalSystems.ExcretorySystem.Aldosterone_regulatedsodiumreabsorption	0			-
Metabolism.XenobioticsBiodegradationandMetabolism.Drugmetabolism_cytochromeP450	2.44159			-
EnvironmentalInformationProcessing.MembraneTransport.Phosphotransferasesystem_PTS_	3.6708			-
HumanDiseases.InfectiousDiseases.Staphylococcusaureusinfection	1.69869			-
HumanDiseases.MetabolicDiseases	3.01963			-
Metabolism.LipidMetabolism	4.47204			-
EnvironmentalInformationProcessing.SignalTransduction.Two_componentsystem	4.14907			-
GeneticInformationProcessing.Folding_SortingandDegradation.RNAdegradation	3.67234			-
Metabolism.XenobioticsBiodegradationandMetabolism.Chlorocyclohexaneandchlorobenzenedegradation	2.15592			-
GeneticInformationProcessing.Folding_SortingandDegradation.Ubiquitinsystem	1.79444			-
EnvironmentalInformationProcessing.SignalingMoleculesandInteraction.GTP_bindingproteins	0			-
CellularProcesses.CellMotility	4.32263			-
HumanDiseases.CardiovascularDiseases.Viralmyocarditis	0			-
Metabolism.BiosynthesisofOtherSecondaryMetabolites.Tropane_piperidineandpyridinealkaloidbiosynthesis	3.07729			-
Metabolism.GlycanBiosynthesisandMetabolism.Lipopolysaccharidebiosynthesis	3.39274			-
Metabolism.XenobioticsBiodegradationandMetabolism.Fluorobenzoatedegradation	1.90948			-
Metabolism.MetabolismofTerpenoidsandPolyketides.Biosynthesisofvancomycingroupantibiotics	2.7797			0.0412268
OrganismalSystems.NervousSystem.Long_termdepression	0			-
EnvironmentalInformationProcessing.SignalTransduction.TGF_betasignalingpathway	0			-
Metabolism.MetabolismofTerpenoidsandPolyketides.BiosynthesisoftypeIIpolyketideproducts	0			-
Metabolism.AminoAcidMetabolism.Glycine_serineandthreoninemetabolism	3.90965			-
OrganismalSystems.SensorySystem	0			-
Metabolism.AminoAcidMetabolism.Valine_leucineandisoleucinebiosynthesis	3.88595			-
Metabolism.XenobioticsBiodegradationandMetabolism.Drugmetabolism_otherenzymes	3.54456			-
OrganismalSystems.ImmuneSystem.FcgammaR_mediatedphagocytosis	0			-
GeneticInformationProcessing.Translation.RNAtransport	3.18242			-
Metabolism.CarbohydrateMetabolism.Galactosemetabolism	3.90251			-
Metabolism.GlycanBiosynthesisandMetabolism.Glycosylphosphatidylinositol_GPI__anchorbiosynthesis	0			-
OrganismalSystems.DigestiveSystem.Carbohydratedigestionandabsorption	2.23574			-
OrganismalSystems.NervousSystem.Cholinergicsynapse	0			-
Metabolism.BiosynthesisofOtherSecondaryMetabolites.Butirosinandneomycinbiosynthesis	2.95928			-
EnvironmentalInformationProcessing.SignalingMoleculesandInteraction.ECM_receptorinteraction	0			-
CellularProcesses.CellMotility.Bacterialchemotaxis	3.65228			-
OrganismalSystems.ImmuneSystem.RIG_I_likereceptorsignalingpathway	1.44224			-
HumanDiseases.ImmuneSystemDiseases	2.62561			-
HumanDiseases.InfectiousDiseases.PathogenicEscherichiacoliinfection	0.300249			-
Metabolism.MetabolismofOtherAminoAcids.Cyanoaminoacidmetabolism	3.47972			-
CellularProcesses.CellMotility.Bacterialmotilityproteins	3.93976			-
OrganismalSystems.DigestiveSystem.Proteindigestionandabsorption	2.22279			0.0412268
Metabolism.MetabolismofTerpenoidsandPolyketides.Carotenoidbiosynthesis	1.95313			-
Metabolism.BiosynthesisofOtherSecondaryMetabolites.Indolealkaloidbiosynthesis	0			-
OrganismalSystems.DigestiveSystem.Fatdigestionandabsorption	0			-
Metabolism.AminoAcidMetabolism.Aminoacidrelatedenzymes	4.17741			-
HumanDiseases.InfectiousDiseases.Africantrypanosomiasis	1.74964			-
GeneticInformationProcessing.ReplicationandRepair.Non_homologousend_joining	2.33427			-
GeneticInformationProcessing.ReplicationandRepair.DNArepairandrecombinationproteins	4.46511			-
Unclassified.Metabolism.Glycanbiosynthesisandmetabolism	2.48748			-
Metabolism.BiosynthesisofOtherSecondaryMetabolites.Betalainbiosynthesis	0			-
HumanDiseases.InfectiousDiseases.Measles	0			-
HumanDiseases.InfectiousDiseases.HepatitisC	0			-
Metabolism.MetabolismofTerpenoidsandPolyketides.Sesquiterpenoidbiosynthesis	0			-
Metabolism.BiosynthesisofOtherSecondaryMetabolites.Isoquinolinealkaloidbiosynthesis	2.7182			-
CellularProcesses.CellCommunication	0			-
CellularProcesses.CellMotility.Regulationofactincytoskeleton	0			-
HumanDiseases.InfectiousDiseases.Tuberculosis	3.19892			-
GeneticInformationProcessing.Folding_SortingandDegradation.Sulfurrelaysystem	3.43258			-
Metabolism.MetabolismofTerpenoidsandPolyketides	4.21758			-
GeneticInformationProcessing.ReplicationandRepair.DNAreplication	3.82601			-
OrganismalSystems.EndocrineSystem	3.50993			-
Metabolism.GlycanBiosynthesisandMetabolism.Glycosaminoglycanbiosynthesis_chondroitinsulfate	0			-
OrganismalSystems.ImmuneSystem.Leukocytetransendothelialmigration	0			-
GeneticInformationProcessing.Transcription.Transcriptionfactors	4.2598			-
Metabolism.EnergyMetabolism.Carbonfixationinphotosyntheticorganisms	3.84275			-
Metabolism.MetabolismofCofactorsandVitamins.Riboflavinmetabolism	3.3435			-
Metabolism.NucleotideMetabolism	4.61368			-
OrganismalSystems.ExcretorySystem.Proximaltubulebicarbonatereclamation	2.43996			-
EnvironmentalInformationProcessing.SignalTransduction.Notchsignalingpathway	0			-
GeneticInformationProcessing	5.31073			-
Metabolism.XenobioticsBiodegradationandMetabolism.Polycyclicaromatichydrocarbondegradation	3.0597			-
HumanDiseases.InfectiousDiseases	3.55212			-
GeneticInformationProcessing.Translation.mRNAsurveillancepathway	0			-
Metabolism.MetabolismofOtherAminoAcids.Phosphonateandphosphinatemetabolism	2.78236			-
Unclassified	5.15102			-
Metabolism.XenobioticsBiodegradationandMetabolism.Dioxindegradation	2.75239			-
Metabolism.EnergyMetabolism.Methanemetabolism	4.104			-
Metabolism.BiosynthesisofOtherSecondaryMetabolites	3.98227			-
Unclassified.CellularProcessesandSignaling.Otherion_coupledtransporters	4.10243			-
HumanDiseases.Cancers.Colorectalcancer	0			-
OrganismalSystems.ExcretorySystem	2.43996			-
Metabolism.MetabolismofTerpenoidsandPolyketides.Zeatinbiosynthesis	2.73737			-
HumanDiseases.CardiovascularDiseases	0			-
EnvironmentalInformationProcessing.MembraneTransport.ABCtransporters	4.55735			-
EnvironmentalInformationProcessing	5.17056			-
Metabolism.EnergyMetabolism	4.75184			-
Metabolism.XenobioticsBiodegradationandMetabolism.1_1_1_Trichloro_2_2_bis_4_chlorophenyl_ethane_DDT_degradation	0.056973			-
HumanDiseases.InfectiousDiseases.Vibriocholeraeinfection	0			-
Metabolism.AminoAcidMetabolism.Tyrosinemetabolism	3.51558			-
HumanDiseases.NeurodegenerativeDiseases	2.92723			-
Unclassified.Metabolism.Biosynthesisandbiodegradationofsecondarymetabolites	2.84286			-
EnvironmentalInformationProcessing.SignalTransduction.MAPKsignalingpathway_yeast	2.59986			-
CellularProcesses.CellGrowthandDeath.Apoptosis	0.50111			-
OrganismalSystems.NervousSystem.Glutamatergicsynapse	3.03144			-
Metabolism.AminoAcidMetabolism.Cysteineandmethioninemetabolism	3.99616			-
OrganismalSystems.ImmuneSystem.CytosolicDNA_sensingpathway	0			-
Metabolism.XenobioticsBiodegradationandMetabolism.Naphthalenedegradation	3.16024			-
OrganismalSystems.SensorySystem.Olfactorytransduction	0			-
HumanDiseases.InfectiousDiseases.Pertussis	2.17954			-
OrganismalSystems.EndocrineSystem.Adipocytokinesignalingpathway	2.85259			-
CellularProcesses.TransportandCatabolism	3.42047			-
Metabolism.XenobioticsBiodegradationandMetabolism.Styrenedegradation	2.30118			-
Metabolism.EnergyMetabolism.Sulfurmetabolism	3.45285			-
Unclassified.GeneticInformationProcessing	4.41933			-
OrganismalSystems.EndocrineSystem.Renin_angiotensinsystem	0			-
EnvironmentalInformationProcessing.SignalTransduction.ErbBsignalingpathway	0			-
OrganismalSystems.ImmuneSystem	2.95419			-
OrganismalSystems.ExcretorySystem.Endocrineandotherfactor_regulatedcalciumreabsorption	0			-
Metabolism.NucleotideMetabolism.Pyrimidinemetabolism	4.28053			-
